1 ***Lotus japonicus* karrikin receptors display divergent ligand-binding**  
2 **specificities and organ-dependent redundancy**

3

4 **Samy Carbonnel<sup>1,2,#,§</sup>, Salar Torabi<sup>1,2,§</sup>, Maximilian Griesmann<sup>1</sup>, Elias Bleek<sup>1</sup>, Yuhong**  
5 **Tang<sup>3</sup>, Stefan Buchka<sup>1</sup>, Veronica Basso<sup>1</sup>, Mitsuru Shindo<sup>4</sup>, François-Didier Boyer<sup>5</sup>,**  
6 **Trevor L. Wang<sup>6</sup>, Michael Udvardi<sup>3</sup>, Mark Waters<sup>7,8</sup>, Caroline Gutjahr<sup>1,2,\*</sup>**

7

8 <sup>1</sup>LMU Munich, Faculty of Biology, Genetics, Biocenter Martinsried, Großhaderner Str. 2-4,  
9 82152 Martinsried, Germany

10

11 <sup>2</sup>Technical University of Munich (TUM), School of Life Sciences Weihenstephan, Plant  
12 Genetics, Emil Ramann Str. 4, 85354 Freising, Germany

13

14 <sup>3</sup>Noble Research Institute, Ardmore, Oklahoma 73401 USA

15

16 <sup>4</sup>Institute for Materials Chemistry and Engineering, Kyushu University, Kasugakoen-6,  
17 Kasuga, Fukuoka, 816-8580, Japan

18

19 <sup>5</sup>Université Paris-Saclay, CNRS, Institut de Chimie des Substances Naturelles, UPR 2301,  
20 91198, Gif-sur-Yvette, France

21

22 <sup>6</sup>John Innes Centre, Norwich Research Park, Norwich NR4 7UH, UK

23

24 <sup>7</sup>School of Molecular Sciences, The University of Western Australia, 35 Stirling Hwy, Perth,  
25 WA 6009, Australia

26

27 <sup>8</sup>Australian Research Council Centre of Excellence in Plant Energy Biology, The University  
28 of Western Australia, 35 Stirling Hwy, Perth, WA 6009, Australia

29

30 <sup>#</sup>Current address: Department of Biology, University of Fribourg, Chemin du Musée 10, 1700  
31 Fribourg, Switzerland

32

33 Address for correspondence: [caroline.gutjahr@tum.de](mailto:caroline.gutjahr@tum.de)  
34

35

<sup>§</sup>These authors contributed equally to this work.

36

37 **Short title:** Ligand specificity of *Lotus japonicus* KAI2 receptors

38 **Abstract**

39 Karrikins (KARs), smoke-derived butenolides, are perceived by the  $\alpha/\beta$ -fold hydrolase  
40 KARRIKIN INSENSITIVE2 (KAI2) and are thought to mimic endogenous, yet elusive plant  
41 hormones tentatively called KAI2-ligands (KLs). The sensitivity to different karrikin types as  
42 well as the number of *KAI2* paralogs varies among plant species, suggesting diversification  
43 and co-evolution of ligand-receptor relationships. In legumes, which comprise a number of  
44 important crops with protein-rich, nutritious seed, *KAI2* has duplicated. We report sub-  
45 functionalization of KAI2a and KAI2b in the model legume *Lotus japonicus* and demonstrate  
46 that their ability to bind the synthetic ligand GR24<sup>ent-5DS</sup> differs *in vitro* as well as in genetic  
47 assays in *Lotus japonicus* and in the heterologous *Arabidopsis thaliana* background. These  
48 differences can be explained by the exchange of a widely conserved phenylalanine in the  
49 binding pocket of KAI2a with a tryptophan in KAI2b, which occurred independently in KAI2  
50 proteins of several unrelated angiosperms. Furthermore, two polymorphic residues in the  
51 binding pocket are conserved across a number of legumes and may contribute to ligand  
52 binding preferences. Unexpectedly, *L. japonicus* responds to diverse synthetic KAI2-ligands  
53 in an organ-specific manner. Hypocotyl development responds to KAR<sub>1</sub>, KAR<sub>2</sub> and *rac*-GR24,  
54 while root system development responds only to KAR<sub>1</sub>. This organ-specificity cannot be  
55 explained by receptor-ligand preferences alone, because *LjKAI2a* is sufficient for karrikin  
56 responses in the hypocotyl, while *LjKAI2a* and *LjKAI2b* operate redundantly in roots. Our  
57 findings open novel research avenues into the evolution and diversity of butenolide ligand-  
58 receptor relationships, their ecological significance and the mechanisms controlling diverse  
59 developmental responses to different KAI2 ligands.

## 60 Introduction

61 Karrikins (KARs) are small butenolide compounds derived from smoke of burning vegetation  
62 that were identified as germination stimulants of fire-following plants [1]. They can also  
63 accelerate seed germination of species that do not grow in fire-prone environments such as  
64 *Arabidopsis thaliana*, which enabled the identification of genes encoding karrikin receptor  
65 components via forward and reverse genetics. The  $\alpha/\beta$ -fold hydrolase KARRIKIN  
66 INSENSITIVE2 (KAI2) is thought to bind KARs, and interacts with the F-box protein MORE  
67 AXILLIARY GROWTH 2 (MAX2) that is required for ubiquitylation of repressor proteins via  
68 the Skp1-Cullin-F-box (SCF) complex [2-9]. There are six known KARs, of which KAR<sub>1</sub> is  
69 most abundant in smoke-water and most active on seed germination of fire-following plants  
70 [1, 10, 11], but *Arabidopsis* responds more strongly to KAR<sub>2</sub>, which lacks the methyl group at  
71 the butenolide ring that is characteristic for KAR<sub>1</sub> [2, 3, 11]. Both KAR<sub>1</sub> and KAR<sub>2</sub> are  
72 commercially available and commonly used in research.

73  
74 *Arabidopsis* KAI2 regulates several traits in addition to seed germination, including light-  
75 dependent hypocotyl growth inhibition, cotyledon and rosette leaf area, cuticle thickness,  
76 root hair length and density, root skewing and lateral root density [4, 12-15]. Moreover, the  
77 rice orthologs of *KAI2* (*D14-LIKE*) and *MAX2* (*D3*) are essential for root colonization by  
78 arbuscular mycorrhiza (AM) fungi, and are involved in regulating mesocotyl elongation [7,  
79 16, 17]. These roles of KAI2, unrelated to smoke and seed germination, suggest that karrikins  
80 mimic yet-unknown endogenous (and possibly AM fungus-derived) signalling molecules that  
81 bind to KAI2 to regulate plant development or AM symbiosis, and are provisionally called  
82 KAI2-ligands (KLs) [12, 18].

83

84 Structurally, KARs resemble the apocarotenoid strigolactones (SLs), which were originally  
85 discovered in root exudates in the rhizosphere [19], where they act as germination cues for  
86 parasitic weeds [19] and as stimulants of AM fungi [20, 21]. In addition to their function in the  
87 rhizosphere, SLs function endogenously as phytohormones and repress shoot branching [22,  
88 23]. SL signalling also affects secondary growth; and co-regulates lateral and adventitious  
89 root formation and rice mesocotyl elongation with the karrikin signalling pathway [7, 15, 24,  
90 25]. As with KARs, SLs are perceived by an  $\alpha/\beta$ -fold hydrolase D14/DAD2 that, like KAI2,  
91 depends for function on a serine–histidine–aspartate catalytic triad within the ligand binding  
92 pocket [26, 27]. As KAI2, D14 interacts with the SCF-complex via the same F-box protein  
93 MAX2 [9, 26] to ubiquitylate repressors of the SMXL family and mark them for degradation  
94 by the 26S proteasome [28-31].

95 Phylogenetic analysis of the  $\alpha/\beta$ -fold hydrolase receptors in extant land plants revealed that  
96 an ancestral *KAI2* is already present in charophyte algae, while the so-called eu-*KAI2* is  
97 ubiquitous among land plants. The strigolactone receptor gene, *D14* evolved only in the seed  
98 plants likely through duplication of *KAI2* and sub-functionalization [32]. An additional  
99 duplication in the seed plants gave rise to *D14-LIKE2* (*DLK2*), an  $\alpha/\beta$ -fold hydrolase of  
100 unknown function, which is transcriptionally induced in response to KAR treatment in a *KAI2*-  
101 and *MAX2*-dependent manner, and currently represents the best-characterized KAR marker  
102 gene in *Arabidopsis* [4, 33]. Despite their similarity, *KAI2* and *D14* cannot replace each other  
103 in *Arabidopsis*, as shown by promoter swap experiments [34]. This indicates that their  
104 expression pattern does not determine their signaling specificity. Instead, this is reached by  
105 ligand-receptor preference, and most likely the tissue-specific presence of their ligands, as

106 well as distinctive interaction with other proteins, such as repressors of the SMXL family to  
107 trigger downstream signaling [35].

108 In *Arabidopsis* and rice, in which KAR/KL signalling has so far been mostly studied, *KAI2* is  
109 a single copy gene. However, *KAI2* has multiplied and diversified in other species. For  
110 example, the *Physcomitrella patens* genome contains 11 genes encoding KAI2-like proteins  
111 [36]. Of these some preferentially bind KAR and others the SL 5-deoxystrigol *in vitro* and this  
112 preference is determined by polymorphic amino acids in a loop that determines the rigidity of  
113 the ligand-binding pocket [37]. The genomes of parasitic plants of the Orobanchaceae also  
114 contain several *KAI2* copies. Some of these have evolved to perceive strigolactones, some  
115 can restore KAR-responses in *Arabidopsis kai2* mutants, and others do not mediate  
116 responses to any of these molecules in *Arabidopsis* [12, 38, 39]. Thus, in plant species with  
117 an expanded KAI2-family there is scope for a diverse range of ligands and ligand-binding  
118 specificities, as well as for diverse protein interaction partners. Apart from discriminating  
119 KARs from SLs, it was very recently reported that *KAI2* genes have diversified in the genome  
120 of the fire follower *Brassica tournefortii* to encode KAI2 receptors, with different ligand  
121 preferences towards KAR<sub>1</sub> and KAR<sub>2</sub> [40]. Of these, *BtKAI2a* mediates stronger responses  
122 to KAR<sub>2</sub>, while *BtKAI2b* mediates stronger responses to KAR<sub>1</sub>, when expressed in the  
123 heterologous *Arabidopsis* background. This binding preference is determined by two valine  
124 (*BtKAI2a*) to leucine (*BtKAI2b*) substitutions at the ligand binding pocket [40]. Also among  
125 plants with a single copy *KAI2* gene, the responsiveness to karrikin molecules can differ  
126 significantly: *Arabidopsis* plants respond more strongly to KAR<sub>2</sub> than to KAR<sub>1</sub> [4, 15]. In  
127 contrast, rice roots did not display any transcriptional response to KAR<sub>2</sub>, not even for the

128 marker gene *DLK2* [16]. It is yet unclear what determines these differences in KAR<sub>2</sub>  
129 responsiveness among plant species.

130 Legumes comprise a number of agronomically important crops and they are special among  
131 plants as most species in the family can form nitrogen-fixing root nodule symbiosis with  
132 rhizobia in addition to arbuscular mycorrhiza. Given the possible diversity in KAI2-ligand  
133 specificities among plant species, we characterized the karrikin receptor machinery in a  
134 legume, using *L. japonicus* as a model. We found that *KAI2* has duplicated prior to the  
135 diversification of legumes and that *L. japonicus* KAI2a and KAI2b differ in their binding  
136 preferences to synthetic ligands *in vitro* and in the heterologous *Arabidopsis kai2* and *kai2*  
137 *d14* mutant backgrounds. We demonstrate that these ligand binding preferences can be  
138 explained by substitution of a highly conserved phenylalanine to a tryptophan in the binding  
139 pocket of *LjKAI2b*. This tryptophan occurs rarely also in other unrelated angiosperm species,  
140 and seems to have arisen several times independently. Two additional polymorphic residues  
141 that are conserved in the KAI2a and KAI2b clades across several legumes may also  
142 contribute to ligand binding preference. In addition, we found a surprising organ-specific  
143 responsiveness to synthetic KAI2-ligands, with *L. japonicus* hypocotyl development  
144 responding to KAR<sub>1</sub>, KAR<sub>2</sub> and the strigolactone/karrikin analog *rac*-GR24, and root system  
145 development responding only to KAR<sub>1</sub>. These responses depend only on *LjKAI2a* in  
146 hypocotyls, while *LjKAI2a* and *LjKAI2b* operate redundantly in roots. Together these findings  
147 suggest that a diversity of mechanisms may influence KAR/KL responses including receptor-  
148 ligand binding specificity or organ-specific interaction of KAI2 with other proteins.

149

150

## 151 **Results**

### 152 ***KAI2* underwent duplication prior to diversification of the legumes**

153 To characterize the karrikin and the strigolactone perception machinery in *L. japonicus* we  
154 retrieved *KAI2*, *D14* and *MAX2* by protein BLAST using Arabidopsis *KAI2*, *D14* and *MAX2*  
155 as templates. A phylogenetic tree revealed that *LjD14* (*Lj5g3v0310140.4*) is a single copy  
156 gene whereas *LjKAI2* has duplicated (Fig 1), resulting in two paralogs *LjKAI2a*  
157 (*Lj2g3v1931930.1*) and *LjKAI2b* (*Lj0g3v0117039.1*). The *KAI2* duplication event must have  
158 occurred prior to the diversification of the legumes or at least before the separation of the  
159 Millettoids and the ‘Hologalegina’ clade [41] because a similar duplication pattern as in *L.*  
160 *japonicus* (Hologalegina) is also detected in pea, *Medicago truncatula* (both Hologalegina)  
161 and soybean (Millettoid). The Millettoid soybean genome additionally contains a third, more  
162 distantly related *KAI2* copy (*KAI2c*).

163 The F-box protein-encoding gene *LjMAX2* also underwent duplication likely as a result of  
164 whole genome duplication, because the two *LjMAX2* copies are in two syntenic regions of  
165 the genome (S1A Fig). However, only one *LjMAX2* copy (*Lj3g3v2851180.1*) is functional. The  
166 other copy *ΨMAX2-like* (*Lj0g3v0059909.1*) appears to be a pseudogene, as it contains an  
167 early stop codon, thus encoding a putative truncated protein of 216 instead of 710 amino  
168 acids (S1B Fig). It appears that an insertion of one nucleotide into *ΨMAX2-like* created a  
169 frameshift, as manual deletion of thymine 453 restores a correct nucleotide and amino acid  
170 sequence (S1B Fig).

171 We hypothesized that *L. japonicus* (and other legumes) retained two intact *KAI2* copies  
172 because they may have functionally diverged, perhaps through changes in their expression

173 pattern and/or sequence, possibly resulting in a divergent spatial distribution, ligand affinity  
174 and/or ability to interact with other proteins. We examined transcript accumulation of *LjKAI2a*  
175 and *LjKAI2b*, as well as *LjD14* and *LjMAX2* in different organs of *L. japonicus* (S2 Fig).  
176 Overall, both *LjKAI2a* and *LjKAI2b* transcripts accumulated to higher levels than those of  
177 *LjD14* and *LjMAX2*. *LjKAI2a* transcripts accumulated approximately 100-fold more in aerial  
178 organs than *LjKAI2b*, whereas *LjKAI2b* accumulated 10-fold more than *LjKAI2a* in roots of  
179 adult plants, which were grown in a sand-vermiculite mix in pots under long day conditions  
180 (16h light / 8h dark). However, 1-week-old seedlings grown on water-agar in Petri dishes  
181 under short-day conditions (8h light / 16h dark), displayed 10-fold higher transcript levels of  
182 *LjKAI2a* than *LjKAI2b* in both roots and hypocotyls (S2B Fig). Thus, *LjKAI2a* and *LjKAI2b* are  
183 regulated in an organ-specific, age- and/or environment-dependent manner, suggesting that  
184 their individual expression involves at least partially different transcriptional regulators.

185 Fusions of the four corresponding proteins with T-Sapphire or mOrange in transiently  
186 transformed *Nicotiana benthamiana* leaves showed similar subcellular localization as in  
187 *Arabidopsis* and rice [16, 17, 42, 43]. T-Sapphire-MAX2 was detected exclusively in the  
188 nucleus, while the  $\alpha/\beta$ -hydrolases (D14, KAI2a and KAI2b) fused to mOrange localized to the  
189 nucleus and cytoplasm (S3A Fig). Western blot analysis confirmed that the mOrange signal  
190 observed in the cytoplasm resulted from the full-length fusion protein and not from free  
191 mOrange (S3B Fig).

192

### 193 ***L. japonicus* KAI2a, KAI2b and D14 can replace their orthologs in Arabidopsis**

194 To examine whether both *LjKAI2a* and *LjKAI2b* function in a canonical manner, we employed  
195 a well-established hypocotyl elongation assay in *Arabidopsis* [12, 34], after transgenically



196 complementing the *Arabidopsis thaliana kai2-2* mutant [4] with *LjKAI2a* and *LjKAI2b* driven  
197 by the *AtKAI2* promoter. Both restored inhibition of hypocotyl elongation in the *kai2-2* mutant  
198 (Fig 2A). *LjD14* driven by the *AtKAI2* promoter was unable to restore hypocotyl growth  
199 inhibition, but it restored repression of shoot branching of the *Arabidopsis d14-1* mutant [4],  
200 when driven by the *Arabidopsis D14* promoter. As expected, *LjKAI2a* and *LjKAI2b* could not  
201 do the same (Fig 2B and 2C). Together with the phylogenetic analysis (Fig 1), these results  
202 demonstrate that *L. japonicus KAI2a* and *KAI2b* are both functional orthologs of the  
203 *Arabidopsis* karrikin/KL receptor gene *KAI2*, whereas *L. japonicus D14* is the functional  
204 orthologue of the *Arabidopsis* strigolactone receptor gene *D14*. Furthermore, the *L. japonicus*  
205 *KAI2* genes are not interchangeable with *D14* [34].

#### 206 207 ***Lotus japonicus* KAI2a and KAI2b differ in their ligand binding specificity**

208 To explore whether *L. japonicus* *KAI2a* and *KAI2b* can mediate hypocotyl responses to  
209 karrikins, we quantified hypocotyl length of the *Atkai2-2* lines transgenically complemented  
210 with *LjKAI2a* or *LjKAI2b* after treatment with  $KAR_1$  and  $KAR_2$  (Fig 3A and 3B). Two  
211 independent lines complemented with *LjKAI2a* displayed a similar reduction in hypocotyl  
212 growth in response to both  $KAR_1$  and  $KAR_2$ . However, the two lines expressing *LjKAI2b*  
213 responded more strongly to  $KAR_1$  than to  $KAR_2$ , contrasting with the common observation,  
214 that *Arabidopsis* hypocotyl growth tends to be more responsive to  $KAR_2$  [4, 44]. We wondered  
215 if the preference towards a specific *KAR* compound is also observed with *KAI2* from other  
216 species. To this end, we tested the karrikin response in a line resulting from a cross of the  
217 *kai2* mutant *hti-2* with an *Arabidopsis* line transgenic for the cDNA of the rice *D14L/KAI2* [16].  
218 In contrast to *LjKAI2b*, *OsD14L/KAI2* mediated a stronger response to  $KAR_2$  than to  $KAR_1$

219 (Fig 3C). Thus, the differential responsiveness of transgenic Arabidopsis lines to KAR<sub>1</sub> and  
220 KAR<sub>2</sub> does not result from a general incompatibility of a heterologous KAI2 protein with the  
221 Arabidopsis background, but suggests different ligand affinities of the transgenic receptors to  
222 the karrikins or their possible metabolised products [34, 40].

223 The two enantiomers of the synthetic strigolactone *rac*-GR24, namely GR24<sup>5DS</sup> and GR24<sup>ent-</sup>  
224 <sup>5DS</sup>, trigger developmental and transcriptional responses via D14 as well as KAI2,  
225 respectively, in Arabidopsis [15, 45]. For some KAI2-mediated responses, GR24<sup>ent-5DS</sup> was  
226 shown to be more active than karrikin [46] and it has been hypothesized that karrikin may  
227 need to be metabolized *in planta*, to yield a high affinity KAI2 ligand, while this may not be  
228 necessary for GR24<sup>ent-5DS</sup> [34, 46, 47]. We examined whether *LjKAI2a* and *LjKAI2b* can  
229 mediate hypocotyl growth responses to GR24<sup>5DS</sup> and GR24<sup>ent-5DS</sup> in the *Arabidopsis thaliana*  
230 *d14-1 kai2-2* double mutant background (Fig 3D). Lines expressing *LjKAI2a* responded to  
231 both enantiomers with reduced hypocotyl elongation, but displayed a much stronger  
232 response to the preferred KAI2 ligand GR24<sup>ent-5DS</sup>. Unexpectedly, the lines expressing  
233 *LjKAI2b* did not significantly respond to either of the two enantiomers. This contrasting  
234 sensitivity to GR24 enantiomers together with the differences in response to KAR<sub>1</sub> and KAR<sub>2</sub>  
235 suggests that *LjKAI2a* and *LjKAI2b* differ in their binding pocket, resulting in divergent affinity  
236 to the synthetic ligands.

237

### 238 **Replacement of a conserved phenylalanine by a tryptophan at the binding pocket of** 239 **KAI2b explains rejection of GR24<sup>ent-5DS</sup>**

240 We used differential scanning fluorimetry (DSF) to examine whether purified recombinant  
241 *LjKAI2a* and *LjKAI2b* (S4A Fig) display a different ligand affinity *in vitro*, employing GR24<sup>5DS</sup>

242 and GR24<sup>ent-5DS</sup> as model ligands (Fig. 4, S4 Fig). The DSF assay has been widely used for  
243 deducing GR24<sup>5DS</sup> and GR24<sup>ent-5DS</sup> binding to D14 and KAI2 proteins respectively, by means  
244 of thermal destabilization [26, 34, 40, 48-50]. However, DSF is unfortunately not suitable for  
245 the characterization of karrikin binding [34, 40]. Neither *LjKAI2a* nor *LjKAI2b* were  
246 destabilized in the presence of GR24<sup>5DS</sup> (S4B Fig). GR24<sup>ent-5DS</sup> induced a significant thermal  
247 destabilization of *LjKAI2a* at a concentration > 50  $\mu$ M. In contrast, it did not cause any  
248 significant thermal shift of *LjKAI2b* (Fig 4B), thus recapitulating the difference in hypocotyl  
249 growth response between Arabidopsis lines expressing *LjKAI2a* and *LjKAI2b* (Fig 3D).

250 We found 16 conserved amino acid differences between the KAI2a and the KAI2b clade of  
251 the investigated legumes (Fig. S5), which may contribute to functional diversification of KAI2a  
252 and KAI2b. Modelling of *LjKAI2a* and *LjKAI2b* on the KAR<sub>1</sub>-bound *AtKAI2* crystal structure  
253 (4JYM) [5] revealed that only three of these were located at the binding pocket, namely  
254 L160/M161, S190/L191 and M218/L219 (for the KAI2a/KAI2b comparison, Fig 4A). Out of  
255 these three, L219 was conserved between *LjKAI2b* and the KAI2 proteins from Arabidopsis  
256 and rice, which displayed an opposite response pattern to KAR<sub>1</sub> and KAR<sub>2</sub> compared to  
257 *LjKAI2b*, when expressed in the Arabidopsis background (Fig. 3). Therefore, we concluded  
258 that the M218/L219 polymorphism likely does not play a major role in determining the  
259 differential ligand-preference between *LjKAI2a* and *LjKAI2b* and discounted it as a candidate.  
260 However, we also found that in *LjKAI2b* exclusively, a highly conserved phenylalanine inside  
261 the pocket is replaced by tryptophan at position 158 (S5 Fig). Although this tryptophan is not  
262 conserved among other legume KAI2b versions used for the alignment (S5 Fig), we predicted  
263 that this bulky residue should have a strong impact on ligand binding.

264 To understand the impact of the three divergent candidate amino acids on ligand binding, we  
265 generated chimeric receptor proteins (Fig 4B). Exchanging only the two amino acids that are  
266 conserved across KAI2a and KAI2b clades comprising the investigated legumes (S5 Fig) was  
267 sufficient to influence the melting temperature of the two proteins in response to GR24<sup>ent-5DS</sup>.  
268 *LjKAI2a*<sup>M160,L190</sup> became less responsive relative to *LjKAI2a* and displayed a slight shift in  
269 melting temperature only with 200  $\mu$ M GR24<sup>ent-5DS</sup>, whereas *LjKAI2b*<sup>L161,S191</sup> gained a weak  
270 ability to respond to GR24<sup>ent-5DS</sup> at 200  $\mu$ M. When all three amino acids were swapped, the  
271 melting response to GR24<sup>ent-5DS</sup> was entirely switched between the two receptor proteins:  
272 *LjKAI2a*<sup>M160,L190,W157</sup> did not display any thermal shift in presence of GR24<sup>ent-5DS</sup>, whereas  
273 *LjKAI2b*<sup>L161,S191,F158</sup> gained a strong response to GR24<sup>ent-5DS</sup> and displayed a thermal shift with  
274 ligand concentrations as low as 25  $\mu$ M. Thus, *LjKAI2b*<sup>L161,S191,F158</sup> seemed to be slightly more  
275 prone to ligand-induced destabilisation than wild-type *LjKAI2a*. As W158 appeared to be a  
276 critical amino acid for restricting the response to GR24<sup>ent-5DS</sup>, we also tested whether  
277 swapping F157 with W158 alone would suffice to exchange the ability of the receptors to  
278 respond to GR24<sup>ent-5DS</sup>. In effect, *LjKAI2b*<sup>F158</sup> recapitulated the response of *LjKAI2a* to  
279 GR24<sup>ent-5DS</sup> and likewise *LjKAI2a*<sup>W157</sup> resembled *LjKAI2b*. Thus, changing this one amino  
280 acid in the binding pocket was sufficient to swap ligand specificity. We conclude that the  
281 F158/W159 polymorphism predominantly determines the ability of *LjKAI2* proteins to bind  
282 GR24<sup>ent-5DS</sup>, while there is a weaker contribution of L160/M161 and S190/L191.

283 As an alternative means to probe ligand-receptor interactions, intrinsic tryptophan  
284 fluorescence assays confirmed the response of wild-type *LjKAI2a* and *LjKAI2b* and all mutant  
285 versions to GR24<sup>ent-5DS</sup> (S6 Fig). Unfortunately, because GR24<sup>ent-5DS</sup> precipitated above 500  
286  $\mu$ M, this assay did not allow us to calculate  $K_d$  values because saturation of response could

287 not be achieved. Nevertheless, the qualitative results reiterate the strong impact of  
288 F158/W159 on the relative affinities of *LjKAI2a* and *LjKAI2b* for GR24<sup>ent-5DS</sup>.

289 To examine whether the three amino acid residues determine ligand discrimination *in planta*,  
290 we transformed Arabidopsis *d14 kai2* double mutants with the mutated *LjKAI2a* and *LjKAI2b*  
291 genes driven by the Arabidopsis *KAI2* promoter and performed the hypocotyl growth assay  
292 in the presence of GR24<sup>ent-5DS</sup>. Swapping only the two amino acids conserved in legumes  
293 (M160/L161 and S190/L191) was insufficient to exchange the GR24<sup>ent-5DS</sup> response between  
294 lines expressing *LjKAI2a* vs. *LjKAI2b*. However, swapping all three amino acids, negatively  
295 affected the capacity of *LjKAI2a*<sup>M160,L190,W157</sup> to mediate a hypocotyl response to GR24<sup>ent-5DS</sup>,  
296 whereas it reconstituted a response via *LjKAI2b*<sup>L161,S191,F158</sup> in three independent transgenic  
297 lines (Fig. 5A and 5B). Although these results do not rule out a contribution of M160/L161  
298 and S190/L191 towards ligand preference, they confirm that the phenylalanine to tryptophan  
299 substitution at position 157/158 is critical for determining the difference in GR24<sup>ent-5DS</sup> binding  
300 preference between the two *L. japonicus* karrikin receptors KAI2a and KAI2b.

301

### 302 **The phenylalanine to tryptophan exchange occurred in several unrelated angiosperms** 303 **independently**

304 The phenylalanine-to-tryptophan transition requires two base changes at position two and  
305 three of the codon. We asked whether this change also occurred in other species and  
306 searched for KAI2 sequences across the plant phylogeny by BLAST-P against the  
307 EnsemblPlants, NCBI and 1KP databases [51], and retrieved KAI2 sequences of the parasitic  
308 plants *Striga hermonthica*, *Orobanche fasciculata* and *Orobanche minor* from Conn et al.  
309 2015 [38]. This analysis showed that the *KAI2c* copy, we detected in the soybean genome

310 (Fig 1) occurred in all analysed genomes of Milletoid legumes, the Genistoid legume *Lupinus*  
311 *albus* and the Mimosoid legume *Prosopis alba* (S7 Fig). This suggests that the members of  
312 the Hologalegina clade, such as *L. japonicus*, have secondarily lost *KAI2c*. Importantly,  
313 among the 156 *KAI2* sequences we analysed, ten in addition to *LjKAI2b* contain a tryptophan  
314 at the position corresponding to 157 in *Arabidopsis KAI2* (S7 Fig). One of them was present  
315 in another legume (*Prosopis alba*). Five were present in other eudicots, of which three were  
316 in the Lamiales (Paulowniaceae: *Paulownia fargesii*; Phrymaceae: *Erythranthe guttata*,  
317 Orobanchaceae: *Orobanche fasciculata*) and two in the Ericales (Primulaceae: *Ardisia*  
318 *evoluta* and *Ardisia humilis*). Furthermore, we found four in monocots of the Bromeliaceae  
319 (*Ananas comosus*), Dioscoreaceae (*Dioscorea rotundata*) and Iridaceae (*Sisyrinchium*  
320 *angustifolium*). In these species, W157 does not co-occur with M160 and L190 as in *LjKAI2b*,  
321 but mostly in combination with the more widely conserved residues L160 and A190 and also  
322 with L160 and L190 in *Prosopis alba* and *Ananas comosus* (S7 Fig). The genomes of all  
323 dicotyledon species encoding a *KAI2* version with W157 contained at least one second copy  
324 encoding F157. In the monocot *Dioscorea rotundata* two *KAI2* copies encoded the W157,  
325 whereas in *Ananas comosus* and *Sisyrinchium angustifolium*, we detected only one *KAI2*  
326 copy. However, we cannot exclude the existence of additional copies as several  
327 transcriptomes in the 1KP database are likely incomplete.

328 In summary, we demonstrate that the F to W transition has occurred several times  
329 independently in the angiosperms without co-dependency on M160 and L190 of *LjKAI2b*, and  
330 in most cases it occurred in a duplicate *KAI2* version. Thus, the binding pocket of *KAI2*  
331 proteins appears to be subject to diversification, broadening the range of diverse *KAI2*-ligand  
332 variants that can be recognized, and at the same time extending the opportunities for binding-

333 and signaling-specificity through KAI2 variants with a less (F157) and/or more (W157)  
334 restrictive binding-pocket.

335

### 336 **Characterization of *L. japonicus* karrikin and strigolactone receptor mutants**

337 To explore the roles of *LjKAI2a* and *LjKAI2b* in *L. japonicus*, we characterized mutants in  
338 these genes as well as in *D14* and *MAX2*. We identified *LORE1* retrotransposon insertions  
339 in *L. japonicus* *KAI2a*, *KAI2b* and *MAX2* (*kai2a-1*, *kai2b-3*, *max2-1*, *max2-2*, *max2-3*, *max2-*  
340 *4*) in available collections [52, 53] and nonsense mutations in *D14* and *KAI2b* (*d14-1*, *kai2b-*  
341 *1*, *kai2b-2*) by TILLING [54] (Fig. 6A, S1 Table). Since some of the *max2* and *kai2b* mutants  
342 were impaired in seed germination or production (S1 Table) we continued working with *kai2b-*  
343 *1*, *kai2b-3*, *max2-3* and *max2-4*. Quantitative RT-PCR analysis revealed that all mutations  
344 caused reduced transcript accumulation of the mutated genes in roots of the mutants except  
345 for *d14-1* (S8 Fig). Furthermore, the transcript accumulation of *LjKAI2a* and *LjKAI2b* was not  
346 affected by mutation of the respective other paralog (S8A Fig).

347 The *LORE1* insertion in the *kai2a-1* mutant is located close (19 bp) to a splice acceptor site.  
348 Since some *LjKAI2a* transcript accumulated in the mutant, we sequenced this residual  
349 transcript to examine the possibility that a functional protein could still be made through loss  
350 of *LORE1* by splicing. We found that indeed a transcript from ATG to stop accumulates in  
351 *kai2a-1* but it suffers from mis-splicing leading to a loss of the *LORE1* transposon plus 15 bp  
352 (from 369 - 383), corresponding to five amino acids (YLNDV) at position 124-128 of the  
353 protein (S9A-9B Fig). This amino-acid stretch reaches from a loop at the surface of the protein  
354 into the cavity of the binding pocket (S9C Fig). The artificial splice variant did not rescue the

355 *Arabidopsis kai2-2* hypocotyl phenotype, confirming that it is not functional *in planta* and  
356 showing that the amino acids 124-YLNDV-128 are essential for *LjKAI2a* function (S9D Fig).

357

358 **Karrikin and *rac*-GR24 cause reduction in hypocotyl growth of *L. japonicus* in an**  
359 ***LjKAI2a*-dependent manner**

360 The *d14-1* and all *max2* mutants displayed increased shoot branching, indicating that the *L.*  
361 *japonicus* strigolactone receptor components D14 and MAX2 are involved in shoot branching  
362 inhibition (Fig 6B and 6C), as for *Arabidopsis*, pea and rice [4, 43, 55, 56]. In addition, *d14*  
363 and *max2* mutants had smaller leaves (Fig 6D), a phenotype that has not yet been associated  
364 with strigolactone signalling in other dicotyledon species. Surprisingly, *kai2a* and *kai2b* single  
365 mutants as well as *kai2a-1 kai2b-1* double mutants or *max2* mutants did not display the  
366 canonical elongated hypocotyl phenotype, which is observed in *Arabidopsis* [4] also in white  
367 light conditions (Fig 2, 3 and 5). If anything, the *kai2a-1 kai2b-1* and *max2* mutant hypocotyls  
368 were shorter than those of the wild type (Fig. 6E). This indicates that the requirement of KL  
369 perception for suppression of hypocotyl elongation under white light is not conserved in *L.*  
370 *japonicus* and/or that KL may not be produced under these growth conditions.

371 To examine whether *L. japonicus* hypocotyls are responsive to karrikin treatment, we  
372 measured the dose-response of hypocotyl growth in wild-type to KAR<sub>1</sub>, KAR<sub>2</sub> and also to *rac*-  
373 GR24. Hypocotyl elongation of wild type plants was progressively inhibited with increasing  
374 concentrations of all three compounds (S10A Fig). However, it was not suppressed by KAR<sub>1</sub>  
375 or KAR<sub>2</sub> treatment in the *kai2a-1 kai2b-1* double mutant and the *max2-4* mutant (S10B-10C  
376 Fig). This demonstrates that similar to *Arabidopsis*, the hypocotyl response to karrikin of *L.*  
377 *japonicus* depends on the KAI2-MAX2 receptor complex. We also examined the KAR<sub>1</sub>



378 response of *kai2a* and *kai2b* single mutant hypocotyls and found that *kai2a-1* did not  
379 significantly respond to KAR<sub>1</sub> and KAR<sub>2</sub>, while the two allelic *kai2b* mutants showed reduced  
380 hypocotyl growth in response to both karrikins (S10B Fig). The transcript accumulation  
381 pattern of *DLK2* (*Lj2g3v0765370*) – a classical karrikin marker gene in Arabidopsis [4, 45] –  
382 was consistent with this observation and *DLK2* was induced in hypocotyls by KAR<sub>1</sub> and KAR<sub>2</sub>  
383 in a *LjKAI2a*-dependent but *LjKAI2b*-independent manner (S10D Fig). *rac*-GR24 treatment  
384 induced an increase of *DLK2* transcripts in a *LjKAI2b*-independent, partially *LjKAI2a*-  
385 dependent, and fully *MAX2*-dependent manner, suggesting that this induction is mediated via  
386 *LjKAI2a* (*GR24<sup>ent-5DS</sup>*) and *LjD14* (*GR24<sup>5DS</sup>*), similar to Arabidopsis [45] (S10C Fig). In  
387 summary, *LjKAI2a* appears to be necessary and sufficient to perceive karrikins and *GR24<sup>ent-</sup>*  
388 *5DS* in the *L. japonicus* hypocotyl, possibly because expression of *LjKAI2b* in hypocotyls is too  
389 low under short day conditions (S2B Fig).

390

### 391 ***L. japonicus* root system architecture is modulated by KAR<sub>1</sub> but not by KAR<sub>2</sub> treatment**

392 *rac*-GR24 treatment can trigger root system architecture changes in Arabidopsis and  
393 *Medicago truncatula* [57-59], and it has recently become clear for Arabidopsis that lateral and  
394 adventitious root formation is co-regulated by karrikin and strigolactone signalling [15, 25].  
395 We examined whether *L. japonicus* root systems respond to *rac*-GR24, KAR<sub>1</sub> and KAR<sub>2</sub> (Fig.  
396 7A). Surprisingly, in contrast to Arabidopsis and *M. truncatula*, *L. japonicus* root systems  
397 responded neither to *rac*-GR24 nor to KAR<sub>2</sub>. Only KAR<sub>1</sub> treatment led to a dose-dependent  
398 decrease in primary root length and an increase of post-embryonic root (PER) number, and  
399 thus to a higher PER density (Fig. 7A). PERs include lateral and adventitious roots that can  
400 be difficult to distinguish in *L. japonicus* seedlings grown on Petri dishes. The instability of

401 *rac*-GR24 over time in the medium could potentially prevent a developmental response of the  
402 root to this compound in our experiments [60]. However, refreshing the medium with new *rac*-  
403 GR24 or karrikins at 5 days post- germination, did not alter the outcome (Fig. 7B).  
404 Consistently, we observed *DLK2* induction in roots after KAR<sub>1</sub> but not after KAR<sub>2</sub> treatment  
405 (Fig. 7C).

406 Together with the hypocotyl responses to KAR<sub>1</sub>, KAR<sub>2</sub> and *rac*-GR24 this indicates organ-  
407 specific sensitivity or responsiveness to these three compounds in *L. japonicus* with a more  
408 stringent uptake, perception and/or response system in the root.

409 Surprisingly, we found that the roots responded to *rac*-GR24 treatment with increased *DLK2*  
410 transcript accumulation (Fig. 7D) although no change in root architecture was observed in  
411 response to this treatment (Fig. 7A). This suggests that different ligands may be transported  
412 to different tissues or may have a divergent impact on receptor conformation, thereby  
413 mediating different downstream responses. To confirm the contrasting responses of *L.*  
414 *japonicus* root systems to KAR<sub>1</sub> and *rac*-GR24, and to test whether they result from divergent  
415 molecular outputs, we examined transcriptional changes after one, two and six hours  
416 treatment of *L. japonicus* wild-type roots with KAR<sub>1</sub> and *rac*-GR24 using microarrays.  
417 Statistical analysis revealed a total number of 629 differentially expressed (DE) genes for  
418 KAR<sub>1</sub>-treated and 232 genes for *rac*-GR24-treated roots (Table S2). In agreement with  
419 previous reports from Arabidopsis and tomato [44, 61, 62] the magnitude of differential  
420 expression was low. Most of the DE genes upon KAR<sub>1</sub> and *rac*-GR24 treatment responded  
421 solely after 2h (S11 Fig). Interestingly, only a minority of 48 genes responded in the same  
422 direction in response to both KAR<sub>1</sub> and *rac*-GR24, while the majority of genes responded  
423 specifically to KAR<sub>1</sub> (580 DEGs) or *rac*-GR24 (169 DEGs). If *rac*-GR24 were to simply mimic

424 the effect of KAR (GR24<sup>ent-5DS</sup>) and SL (GR24<sup>5DS</sup>) on roots, one would have expected a large  
425 overlap with KAR<sub>1</sub> responses, and in addition a number of non-overlapping DEGs, regulated  
426 through D14. In summary, the microarray experiment confirmed largely non-overlapping  
427 responses of *L. japonicus* root response to KAR<sub>1</sub> and *rac*-GR24.

428

429 **Both *LjKAI2a* and *LjKAI2b* mediate root architecture-responses to KAR<sub>1</sub> but only**  
430 ***LjKAI2a* mediates *DLK2* expression in response to GR24<sup>ent-5DS</sup>**

431 To inspect which  $\alpha/\beta$ -hydrolase receptor mediates the changes in *L. japonicus* root system  
432 architecture in response to KAR<sub>1</sub> treatment, we examined PER density in the karrikin receptor  
433 mutants. The *Ljkai2a-1 kai2b-1* double mutant and the *max2-4* mutant did not respond to  
434 KAR<sub>1</sub> treatment with changes in root system architecture (Fig. 8A, S12 Fig). With 1  $\mu$ M KAR<sub>1</sub>,  
435 we obtained contradictory results for the single *kai2a* and *kai2b* mutants in independent  
436 experiments (S12A and S12C Fig). However, *kai2a* and *kai2b* single mutants but not the  
437 *kai2a kai2b* double mutant responded to a slightly higher concentration of 3  $\mu$ M KAR<sub>1</sub> (Fig.  
438 8A), indicating that *LjKAI2a* and *LjKAI2b* redundantly perceive KAR<sub>1</sub> (or a metabolite thereof)  
439 in *L. japonicus* roots. This pattern was mirrored by *DLK2* expression in roots: both *kai2a* and  
440 *kai2b* single mutants responded to KAR<sub>1</sub> with increased *DLK2* expression, while the *kai2a-1*  
441 *ka2b-1* double mutant and the *max2-4* mutant did not respond (Fig. 8B). Since *LjKAI2b* did  
442 not respond to GR24<sup>ent-5DS</sup> *in vitro* as well as in the heterologous Arabidopsis background  
443 (Fig 4 and 5, S6 Fig), we examined its ability to mediate *DLK2* induction by GR24<sup>ent-5DS</sup> in *L.*  
444 *japonicus* roots. Wild-type and *kai2b* mutant roots responded to GR24<sup>ent-5DS</sup> with increased  
445 *DLK2* expression, but this was not the case for *kai2a* roots confirming that *LjKAI2b* cannot  
446 bind and mediate responses to GR24<sup>ent-5DS</sup> (Fig 8C). In summary, *LjKAI2a* and *LjKAI2b* act

447 redundantly in roots in mediating responses to KAR<sub>1</sub> but only KAI2a can perceive GR24<sup>ent-</sup>  
448 <sup>5DS</sup>.

449

## 450 **Discussion**

451 Gene duplication followed by sub- or neofunctionalization is an important driver in the  
452 evolution of complex signalling networks and signalling specificities during the adaptation to  
453 new or diverse environments. In the legumes, the karrikin receptor gene *KAI2* multiplied  
454 possibly during the whole genome duplication that occurred in the Papilionoidaea before the  
455 diversification of legumes 59 million years ago [63]. While the Mimosoids, Genistoids and  
456 Millettioids, contain three different *KAI2* versions, the Hologalegina clade appears to have lost  
457 one of them, retaining the more closely related *KAI2a* and *KAI2b* versions. Here, we provide  
458 evidence that *L. japonicus* *KAI2a* and *KAI2b* diversified in their ligand-binding specificity as  
459 well as organ-specific requirement (Fig 9).

460 *LjKAI2a* and *LjKAI2b* differ in their quantitative sensitivity to KAR<sub>1</sub> and KAR<sub>2</sub>, which vary only  
461 by the presence of one methyl group in KAR<sub>1</sub> (Fig. 3B). An increased hydrophobicity of the  
462 *LjKAI2b* binding pocket as compared to *LjKAI2a* may mediate the preference towards the  
463 more hydrophobic KAR<sub>1</sub>, similar to the fire-following plant *Brassica tournefortii* [40]. The  
464 difference in ligand preference of *LjKAI2a* vs. *LjKAI2b* is more dramatic for GR24<sup>ent-5DS</sup>, an  
465 enantiomer of the synthetic strigolactone analogue *rac*-GR24, which acts through Arabidopsis  
466 *KAI2* when applied to plants, promotes interaction of *KAI2* with *SMAX1* in yeast and binds to  
467 *AtKAI2 in vitro* [8, 15, 34, 45, 46]. We show that *LjKAI2a* mediates strong hypocotyl growth  
468 responses to GR24<sup>ent-5DS</sup> in Arabidopsis as well as transcriptional activation of *DLK2* in *Lotus*  
469 *japonicus* roots. *LjKAI2b* is incapable of triggering these responses to the compound, while

470 being able to induce the same responses upon KAR<sub>1</sub> treatment. The dramatic difference in  
471 the ability of *LjKAI2a* and *LjKAI2b* to bind GR24<sup>ent-5DS</sup> is confirmed *in vitro* by DSF and intrinsic  
472 tryptophan fluorescence assays. Together, these results demonstrate that the individual  $\alpha/\beta$ -  
473 fold hydrolase receptor is sufficient to explain ligand sensitivity in planta.

474 Identifying the determinants of ligand-binding specificity of D14 and different KAI2 and KAI2-  
475 like proteins is an area of active research. Binding specificity of D14 and KAI2 to SLs and  
476 KARs respectively has been associated with the geometry and size of the binding pocket [6,  
477 64]. Changes in amino acid residues located in the pocket of divergent KAI2 versions in  
478 parasitic weeds have enabled alterations in pocket architecture and evolution of a chimeric  
479 receptor that perceives strigolactones like D14 but mediates germination like KAI2 [38, 39].  
480 The rigidity of lid helices forming the tunnel of the binding pocket have been proposed to  
481 determine specificity of KAI2-like proteins for strigolactone-like molecules vs. KAR<sub>1</sub> in  
482 *Physcomitrella patens* [37].

483 We identified three amino acids at the ligand-binding pocket that differ between *LjKAI2a* and  
484 *LjKAI2b*. Two of these are conserved across the legume KAI2a and KAI2b clades, namely  
485 L160 and S190 in KAI2a and M161 and L191 in KAI2b. This pattern of conservation suggests  
486 functional relevance in maintaining flexibility for different KAI2 ligands in legumes. Indeed,  
487 exchanging these two amino acids slightly changes the thermal instability of the two KAI2  
488 versions in the DSF assay. Neither amino acid change is predicted to substantially impact  
489 the pocket volume or geometry but the amino acids of *LjKAI2b* are more hydrophobic, which  
490 may explain the preference for the more hydrophobic KAR<sub>1</sub> over KAR<sub>2</sub>. A similar  
491 phenomenon was observed in *Brassica tournefortii*, a fire-following weed that has two  
492 functional *KAI2* genes [40]. Similar to the situation in *L. japonicus*, *BtKAI2b* mediated a

493 greater sensitivity to KAR<sub>1</sub> over KAR<sub>2</sub> in the Arabidopsis background, while it was the reverse  
494 for *BtKAI2a*. This was explained by one amino acid polymorphism in the binding pocket  
495 towards a more hydrophobic amino acid (V98L) in *BtKAI2b*. Notably, this residue (V98L) is in  
496 a very different position than the polymorphics residues in *L. japonicus* KAI2a/KAI2b,  
497 suggesting that the receptors are highly plastic and that similar binding-specificities may be  
498 achieved by changing hydrophobicity in different positions of the pocket.

499 Exchanging L160/M161 and S190/L191 between *L. japonicus* KAI2a and KAI2b was  
500 sufficient to change their sensitivity to GR24<sup>ent-5DS</sup> in the DSF *in vitro* assay. However, the  
501 developmental response of Arabidopsis hypocotyls was hardly changed, possibly because *in*  
502 *vivo*, suboptimal ligand binding to the receptor can be stabilized by interacting proteins. A  
503 third amino acid difference (F157/W158) between the two KAI2 proteins occurs in *L.*  
504 *japonicus*. This residue critically determines sensitivity to GR24<sup>ent-5DS</sup> *in vitro* as well as in  
505 Arabidopsis likely because the bulky tryptophan may sterically hinder GR24<sup>ent-5DS</sup> binding,  
506 while still allowing binding of the smaller karrikins. In fact, swapping F157 with W158 alone  
507 was sufficient to swap the ability to respond to GR24<sup>ent-5DS</sup> in DSF as well as intrinsic  
508 fluorescence assays.

509 *B. tournefortii* is a fire-following plant, the seeds of which respond to karrikins with dormancy  
510 breaking and germination [40]. Therefore, to maintain two copies of KAI2, one of which is  
511 specialized for KAR<sub>1</sub>, the most abundant KAR in smoke, and the other of which may be  
512 specialized for the endogenously produced ligand makes adaptive sense for *B. tournefortii*.  
513 For *L. japonicus*, which is not a fire-follower, KAR<sub>1</sub>, KAR<sub>2</sub> and GR24<sup>ent-5DS</sup> are likely not natural  
514 KAI2 ligands. Nevertheless, the maintenance of two *KAI2* genes in the Hologalegina  
515 legumes, each with amino acid polymorphisms conferring differences in binding preferences

516 to artificial ligands, requires an adaptive basis. One possibility is that *L. japonicus* KAI2a and  
517 KAI2b have specialized to bind different ligands *in planta*, indicative of legumes producing at  
518 least two different versions of the as-yet-unknown KAI2 ligand. The distinct expression  
519 patterns and developmental roles of *LjKAI2a* and *LjKAI2b* might also be consistent with a  
520 tissue-specific diversity of ligands, or even an endogenous ligand versus an exogenous  
521 ligand derived from the rhizosphere. From our assays with artificial ligands we extrapolate  
522 that *LjKAI2b* has a higher ligand selectivity than *LjKAI2a*. The additional amino acid change  
523 that occurred in *L. japonicus* but not in the other examined legumes may indicate that the KL  
524 bouquet of *L. japonicus* has further diversified. Alternatively, the F to W substitution in *LjKAI2b*  
525 may confer resistance to (a) toxic allelochemical(s) that may be released into the rhizosphere  
526 by competing neighbouring plants or by microorganisms. This speculative hypothesis is  
527 consistent with the role of *LjKAI2b* in roots (but not in hypocotyls) and with the observation  
528 that the F157W exchange occurred in several unrelated plant species independently that may  
529 all encounter compounds capable of blocking KAI2a in their natural habitat. It will be exciting  
530 to investigate the biological significance of this receptor sub-functionalization and the putative  
531 diversity of their ligands, once the molecule class of KL and its variants have been identified.

532 In addition to ligand-binding specificity at the level of the receptor, we identified a surprising  
533 organ-specific responsiveness to synthetic KAI2 ligands in *L. japonicus*. While hypocotyl  
534 growth is inhibited in response to KAR<sub>1</sub>, KAR<sub>2</sub> and *rac*-GR24, root systems only respond to  
535 KAR<sub>1</sub> with architectural changes (Fig. 9A). To our knowledge such an organ-specific  
536 discrimination of different but very similar KAR molecules has not previously so clearly been  
537 observed. However, a similar scenario could be at play in rice, in which transcriptome analysis  
538 of KAR<sub>2</sub>-treated rice roots identified no differentially expressed gene [16], whereas rice

539 mesocotyls respond with growth inhibition to the same treatment [7, 16]. Although KAI2 can  
540 be shown to bind KAR<sub>1</sub> *in vitro* by isothermal titration calorimetry or fluorescent microdialysis  
541 [5, 6, 65], there is evidence suggesting that KARs are not directly bound by KAI2 *in vivo*, but  
542 may be metabolized first to yield the correct KAI2-ligand, which may bind with higher affinity  
543 [34, 46]. It is possible that substrate specificities differ among enzymes involved in KAR  
544 metabolism in hypocotyls vs. roots. This would imply that the single methyl group, which  
545 distinguishes KAR<sub>1</sub> from KAR<sub>2</sub>, is sufficient to impact specialized metabolism of karrikins.  
546 Alternatively, the transport of KAR<sub>2</sub> or the KAR<sub>2</sub>-derived metabolic product could be limited in  
547 the root system, or KAR<sub>2</sub>-derivatives may be rapidly catabolised in roots, thus limiting their  
548 effect. While KAR<sub>2</sub> fails to induce increased PER density as well as *DLK2* expression in *L.*  
549 *japonicus* roots, GR24<sup>ent-5DS</sup> triggers *DLK2* transcript accumulation albeit being unable to  
550 increase PER density. *DLK2* induction by GR24<sup>ent-5DS</sup> requires KAI2a, thus involvement of  
551 D14 can be excluded. Furthermore, *LjKAI2a* and *LjKAI2b* act redundantly in mediating KAR<sub>1</sub>-  
552 induced root system changes, excluding the possibility that they are regulated exclusively by  
553 *LjKAI2b*, which cannot bind GR24<sup>ent-5DS</sup>. It is tempting to speculate that conformational  
554 changes of KAI2 proteins may differ depending on the ligand and that the extend of the  
555 change may influence the interaction strength with the karrikin signaling repressor SMAX1,  
556 MAX2 and/or additional proteins [8, 66]. Perhaps *DLK2* expression is more sensitive to  
557 quantitative SMAX1 removal than genes required to be induced for root system changes,  
558 such as the ethylene biosynthesis gene *ACS7* [66]. Alternatively, SMAX1 proteins inhibiting  
559 *DLK2* expression are more accessible to the receptor complex, thereby allowing interaction  
560 even when the receptor binds a suboptimal ligand, as compared to SMAX1 individuals  
561 supressing transcriptional acitivity of genes involved in root system changes; or GR24<sup>ent-5DS</sup>



562 is only taken up into a subset cells, in which SMAX1 removal does not mediate root system  
563 changes.

564 We observed that KAR<sub>1</sub> treatment triggers increased PER density in *L. japonicus*. This is  
565 somewhat contradictory to *kai2* and *max2* mutants in Arabidopsis, which display an increased  
566 lateral root density [15]. The discrepancy may result from different physiological optima  
567 between the two species or from nutrient conditions in the two experimental systems. We  
568 observed the KAR<sub>1</sub> response of *L. japonicus* root systems in half-Hoagland solution with low  
569 phosphate levels (2.5µM PO<sub>4</sub><sup>3-</sup>) and without sucrose, whereas the root assay in Arabidopsis  
570 was conducted in ATS medium (*Arabidopsis thaliana* salts) with 1% sucrose [15]. Phosphate  
571 and sucrose levels have previously been described to influence the effect of strigolactone  
572 and *rac*-GR24 on Arabidopsis root architecture [57, 67, 68].

573 In Arabidopsis and rice, KAI2/D14L is required to inhibit hypocotyl and mesocotyl elongation,  
574 respectively [3, 4, 16]. Since these two species are evolutionarily distant from each other, but  
575 have both retained a function of KL signalling in inhibiting the growth of similar organs, it  
576 seemed likely that this function would be conserved among a large number of plant species.  
577 Surprisingly, in *L. japonicus*, we observed no elongated hypocotyl phenotype for the *kai2a-1*  
578 *kai2b-1* double and two allelic *max2* mutants (Fig. 5). However, we could trigger a reduction  
579 of hypocotyl elongation by treatment with KAR<sub>1</sub>, KAR<sub>2</sub> and *rac*-GR24 in the wild type and in  
580 a *LjKAI2a* and *LjMAX2*-dependent manner. Perhaps the endogenous KL levels in *L.*  
581 *japonicus* hypocotyls are insufficient to cause inhibition of hypocotyl elongation, at least under  
582 our growth conditions.

583

584 In summary, we have demonstrated sub-functionalization of two KAI2 copies in *L. japonicus*  
585 with regard to their ligand-binding specificity and organ-specific relevance. Furthermore, we  
586 find organ-specific responsiveness of *L. japonicus* to two artificial KAI2 ligands. A  
587 phenylalanine to tryptophan transition independently occurred in the KAI2-binding pocket in  
588 several angiosperms, while a leucine-to-methionine and a serine-to-leucine exchange are  
589 conserved in KAI2a and KAI2b across legumes. This conservation and independent multiple  
590 occurrence of specific amino acid polymorphisms suggests that they bear functional relevance  
591 for discriminating diverse KAI2 ligands. Our findings open novel research avenues towards  
592 understanding the diversity in KL ligand-receptor relationships and in developmental  
593 responses to, as yet, unknown natural as well as synthetic butenolides that influence diverse  
594 aspects of plant development.

595

## 596 **Materials and methods**

### 597 **Plant material and seed germination**

598 The *A. thaliana kai2-2* (Ler background) and *d14-1* (Col-0 background) mutants are from [4],  
599 the *d14-1 kai2-2* double mutant from [45], the *htl-2* mutant was provided by Min Ni [69] and  
600 the cross with K02821 is from [16]. Seeds were surface sterilized with 70% EtOH. For  
601 synchronizing the germination, seeds were placed on ½ MS 1% agar medium and maintained  
602 at 4°C in the dark for 72 hours.

603 The *L. japonicus* Gifu *max2-1*, *max2-2*, *max2-3*, *max2-4*, *kai2a-1* and *kai2b-3* mutations are  
604 caused by a LORE1 insertion. Segregating seed stocks for each insertion were obtained from  
605 the Lotus Base (<https://lotus.au.dk>, [70]) or Makoto Hayashi (NIAS, Tsukuba, Japan, [53] for  
606 *max2-2*). The *d14-1*, *kai2b-1* and *kai2b-2* mutants were obtained by TILLING [54] at

607 RevGenUK (<https://www.jic.ac.uk/technologies/genomic-services/revgenuk-tiling-reverse->  
608 [genetics/](#)). Homozygous mutants were identified by PCR using primers indicated in S3 Table.  
609 For germination, *L. japonicus* seeds were manually scarified with sand-paper and surface  
610 sterilized with 1% NaClO. Imbibed seeds were germinated on 1/2 Hoagland medium  
611 containing 2.5µM PO<sub>4</sub><sup>3-</sup> and 0.4% Gelrite ([www.duchefa-biochemie.com](http://www.duchefa-biochemie.com)), at 24°C for 3 days  
612 in the dark, or on ½ MS 0.8% agar at 4°C for 3 days in dark (only for the experiment in Fig.  
613 6E).

614

### 615 **Phylogenetic, synteny and protein sequence analysis**

616 *Lotus japonicus* KAI2, D14 and MAX2 sequences were retrieved using tBLASTn with AtKAI2,  
617 AtD14 and AtMAX2, against the NCBI database, the plantGDB database and the *L. japonicus*  
618 genome V2.5 (<http://www.kazusa.or.jp/lotus>). The presence of MAX2-like was identified by  
619 tBLASTn in an in-house genome generated by next generation sequencing using CLC Main  
620 Workbench [71]. Pea sequences were found by BLASTn on “pisum sativum v2” database  
621 with AtKAI2 as query (<https://www.coolseasonfoodlegume.org>). For Fig 1, the MUSCLE  
622 alignment of the protein sequences was used to generate Maximum-likelihood tree with 1000  
623 bootstrap replicates in MEGAX [72]. For the synteny analysis of MAX2 and MAX2-like,  
624 flanking sequences were retrieved from the same in-house genome [71]. For S7 Fig, KAI2  
625 sequences across the plant phylogeny were retrieved by BLAST-P search against the  
626 EnsemblPlants, NCBI and 1KP databases [51], in addition, KAI2 sequences of the parasitic  
627 plants *Striga hermonthica* and *Orobanche cumana* were retrieved from Conn et al. 2015 [38].  
628 The MUSCLE alignment, generated in MEGAX [72], was used to produce a tree with 1000  
629 bootstrap replicates with IQTREE [73].

630

### 631 **Structural homology modelling of proteins**

632 Proteins were modelled using SWISS-MODEL tool (<https://swissmodel.expasy.org>) with the  
633 *A. thaliana* KAI2 (4JYM) templates [5].

634

### 635 **Bacterial protein expression and purification**

636 Full-length *L. japonicus* coding sequences were cloned into pE-SUMO Amp using primers in  
637 S3 Table. Clones were sequence-verified and transformed into Rosetta DE3 pLysS cells  
638 (Novagen). Subsequent protein expression and purification were performed as described  
639 previously [34], with the following modifications: the lysis and column wash buffers contained  
640 10 mM imidazole, and a cobalt-charged affinity resin was used (TALON, Takara Bio).

641

### 642 **Differential scanning fluorimetry**

643 DSF assays were performed as described previously [34]. Assays were performed in 384-  
644 well format on a Roche LightCycler 480 II with excitation 498 nm and emission 640 nm  
645 (SYPRO Tangerine dye peak excitation at 490 nm). Raw fluorescence values were  
646 transformed by calculating the first derivative of fluorescence over temperature. These data  
647 were then imported into GraphPad Prism 8.0 software for plotting. Data presented are the  
648 mean of three super-replicates from the same protein batch; each super-replicate comprised  
649 four technical replicates at each ligand concentration. Experiments were performed at least  
650 twice.

651

### 652 **Intrinsic tryptophan fluorescence (ITF) assay**

653 The ITF assay was performed in 384-well format on a BMG Labtech CLARIOstar multimode  
654 plate reader, using black FLUOtrac microplates (Greiner 781076). Reactions (20  $\mu$ L) were  
655 set up in quadruplicate and contained 10  $\mu$ M protein, 20 mM HEPES pH 7.5, 150 mM NaCl,  
656 1.25% (v/v) glycerol, and 0-500  $\mu$ M ligand. Ligands were initially prepared in DMSO at 20x  
657 concentration, and therefore reactions also contained 5% (v/v) DMSO. Ligands were  
658 dissolved in buffer (20 mM HEPES pH 7.5, 150 mM NaCl, 1.25% (v/v) glycerol) at 2x  
659 concentration immediately before use, of which 10  $\mu$ L per well was dispensed with a  
660 multichannel pipette. An equivalent volume of 2x solution of protein in buffer was prepared  
661 and then dispensed onto the plate using an Eppendorf Multipipette with a 0.1 mL tip. The plate  
662 was mixed at 120 rpm for 2 min, centrifuged at 500x *g* for 2 min, and then incubated in the  
663 dark for 20 min at room temperature. Fluorescence measurements were taken first with fixed  
664 wavelength filters (excitation 295/10 nm; longpass dichroic 325 nm; emission 360/20 nm),  
665 followed by the linear variable filter monochromator for emission wavelength scans (excitation  
666 295/10 nm, emission 334-400 nm, step width 2 nm, emission bandwidth 8 nm).  
667 Measurements were performed at 25 °C using 17 flashes per well for fixed filters or 20 flashes  
668 per well for wavelength scans. Gain and focus settings were set empirically for each  
669 experimental run. Data were blank-corrected by subtraction of fluorescence values from an  
670 identical set of wells containing ligand and buffer but no protein. Data analysis was performed  
671 in Graphpad Prism v8.4. Best fit curves were generated from untransformed fluorescence  
672 readings using nonlinear regression and the in-built “One site - Total” model, with least  
673 squares regression as a fitting method and an asymmetrical (profile-likelihood) 95%  
674 confidence interval. As saturation was not reached, only ambiguous values for *K<sub>d</sub>* were  
675 returned. For emission wavelength scans, fluorescence values at each wavelength were

676 normalised by expressing as a percentage of the corresponding value from samples lacking  
677 ligand.

678

### 679 **Plasmid generation**

680 Genes and promoter regions were amplified using Phusion PCR according to standard  
681 protocols and using primers indicated in S3 Table. Plasmids were constructed by Golden  
682 Gate cloning [74] as indicated in S4 Table.

683

### 684 **Plant transformation**

685 *kai2-2* and *d14-1* mutants were transformed by floral dip in *Agrobacterium tumefaciens* AGL1  
686 suspension. Transgenic seedlings were selected by mCherry fluorescence and resistance to  
687 20 µg/mL hygromycin B in growth medium. Experiments were performed using T2 or T3  
688 generations, with transformed plants validated by mCherry fluorescence.

689

### 690 **Shoot branching assay**

691 *A. thaliana* and *L. japonicus* were grown for 4 and 7 weeks, respectively in soil in the  
692 greenhouse at 16h/8h light/dark cycles. Branches with length >1cm were counted, and the  
693 height of each plant was measured.

694

### 695 **Hypocotyl elongation assay**

696 *A. thaliana* seedlings were grown for 5 days on half-strength Murashige and Skoog (MS)  
697 medium containing 1% agar (BD). *L. japonicus* seedlings were grown for 6 days on half-  
698 strength Hoagland medium containing 2.5µM PO<sub>4</sub><sup>3-</sup> and 0.4% Gelrite ([www.duchefa-](http://www.duchefa-)

699 [biochemie.com](http://biochemie.com)), or on half-strength MS containing 0.8% agar (only for experiment in Fig.  
700 6D). Long-day conditions with 16h/8h light/dark cycles were used to test restoration of *A.*  
701 *thaliana* hypocotyl growth suppression by cross-species complementation (Fig. 2A). For  
702 Karrikin, *rac*-GR24, GR24<sup>5DS</sup> and GR24<sup>ent-5DS</sup> treatments the medium was supplied with KAR<sub>1</sub>  
703 (www.olchemim.cz), KAR<sub>2</sub> (www.olchemim.cz), *rac*-GR24 (www.chiralix.com) GR24<sup>5DS</sup> and  
704 GR24<sup>ent-5DS</sup> ([www.strigolab.eu](http://www.strigolab.eu)) or equal amounts of the corresponding solvent as a control.  
705 Karrikins were solubilized in 75% methanol and *rac*-GR24 and the GR24 stereoisomers in  
706 100% acetone, at 10mM stock solution. Short-day conditions at 8h/16h light/dark cycles were  
707 used to test hormone responsiveness of *A. thaliana* as well as *L. japonicus* hypocotyls. After  
708 high-resolution scanning, the hypocotyl length was measured with Fiji (<http://fiji.sc/>).

709

#### 710 **Root system architecture assay**

711 *L. japonicus* germinated seeds were transferred onto new plates containing KAR<sub>1</sub>  
712 (www.olchemim.cz), KAR<sub>2</sub> (www.olchemim.cz), *rac*-GR24 (www.chiralix.com) or the  
713 corresponding solvent. Karrikins were solubilized in 75% methanol and *rac*-GR24 in 100%  
714 acetone, at 10 mM stock solution. Plates were partially covered with black paper to keep the  
715 roots in the dark, and placed at 24°C with 16-h-light/8-h-dark cycles for 2 weeks. After high-  
716 resolution scanning, post-embryonic root number was counted and primary root length  
717 measured with Fiji (<http://fiji.sc/>).

718

#### 719 **Treatment for analysis of transcript accumulation**

720 Seedling roots were placed in 1/2 Hoagland solution with 2.5 μM PO<sub>4</sub><sup>3-</sup> containing 1 or 3 μM  
721 Karrikin<sub>1</sub> (www.olchemim.cz for qPCR analysis, synthesized according to [75] for microarray

722 analysis), Karrikin<sub>2</sub> ([www.olchemim.cz](http://www.olchemim.cz)), *rac*-GR24 ([www.chiralix.com](http://www.chiralix.com)) or equal amounts of  
723 the corresponding solvents for the time indicated in Figure legends and the roots were  
724 covered with black paper to keep them in the dark.

725

## 726 **Microarray analysis**

727 Three biological replicates were performed for each treatment. Root tissues were harvested,  
728 rapidly blotted dry and shock frozen in liquid nitrogen. RNA was extracted using the Spectrum  
729 Plant Total RNA Kit ([www.sigmaaldrich.com](http://www.sigmaaldrich.com)). RNA was quantified and evaluated for purity  
730 using a Nanodrop Spectrophotometer ND-100 (NanoDrop Technologies, Willington, DE) and  
731 Bioanalyzer 2100 (Agilent, Santa Clara, CA). For each sample, 500 ng of total RNA was used  
732 for the expression analysis of each sample using the Affymetrix GeneChip® Lotus1a520343  
733 (Affymetrix, Santa Clara, CA). Probe labeling, chip hybridization and scanning were  
734 performed according to the manufacturer's instructions for IVT Express Labeling Kit  
735 (Affymetrix). The Microarray raw data was normalized with the Robust Multiarray Averaging  
736 method (RMA) [76] using the Bioconductor [77] package "Methods for Affymetrix  
737 Oligonucleotide Arrays" (affy version 1.48.0) [78]. Control and rhizobial probesets were  
738 removed before statistical analysis. Differential gene expression was analyzed with the  
739 Bioconductor package "Linear Models for Microarray Data" (LIMMA version 3.26.8) [79]. The  
740 package uses linear models for parameter estimation and an empirical Bayes method for  
741 differential gene expression assessment [80]. P-values were adjusted due to multiple  
742 comparisons with the Benjamini-Hochberg correction (implemented in the LIMMA package).  
743 Probesets were termed as significantly differentially expressed, if their adjusted p-value was  
744 smaller than or equal to 0.01 and the fold change for at least one contrast showed a difference



745 of at least 50%. To identify the corresponding gene models, the probeset sequences were  
746 used in a BLAST search against *L. japonicus* version 2.5 CDS and version 3.0 cDNA  
747 sequences (<http://www.kazusa.or.jp/lotus/>). If, based on the bitscore, multiple identical hits  
748 were found, we took the top hit in version 2.5 CDS as gene corresponding to the probe. For  
749 version 3.0 cDNA search we used the best hit, that was not located on chromosome 0, if  
750 possible. For probesets known to target chloroplast genes (probeset ID starting with Lj\_), we  
751 preferred the best hit located on the chloroplast chromosome, if possible. Probeset  
752 descriptions are based on the info file of the *L. japonicus* Microarray chip provided by the  
753 manufacturer (Affymetrix).

754

#### 755 **qPCR analysis**

756 Tissue harvest, RNA extraction, cDNA synthesis and qPCR were performed as described  
757 previously [71]. qPCR reactions were run on an iCycler (Bio-Rad, [www.bio-rad.com](http://www.bio-rad.com)) or on  
758 QuantStudio5 (Applied Biosystems, [www.thermofisher.com](http://www.thermofisher.com)). Expression values were  
759 calculated according to the  $\Delta\Delta C_t$  method [81]. Expression values were normalized to the  
760 expression level of the housekeeping gene *Ubiquitin*. For each condition three to four  
761 biological replicates were performed. Primers are indicated in Table S4.

762

#### 763 **Statistics**

764 Statistical analyses were performed using Rstudio ([www.rstudio.com](http://www.rstudio.com)) after log  
765 transformation for qPCR analysis. F- and p-values for all figures are provided in S5 Table.

766

767

## 768 **Acknowledgments**

769 We thank Andreas Keymer and Priya Pimprikar for cDNAs from root, flower, leaf and stem;  
770 and Verena Klingl for excellent technical support. We thank Martin Parniske (LMU Munich,  
771 Germany) for providing microarray chips and for setting up the *L. japonicus* mutant collection  
772 at the Sainsbury laboratory Norwich, UK; to Jens Stougaard and all scientists at LotusBase  
773 for the LORE1 insertion lines (University of Aarhus, Denmark); and to David Nelson  
774 (University of California Riverside, USA) for fruitful discussion. We thank Min Ni (University  
775 of Minnesota, USA) for seeds of the *A. thaliana htl-2* mutant. The study was supported by an  
776 Australian Research Council Future Fellowship (FT150100162) to M.T.W. and the Emmy  
777 Noether program of the DFG, grant GU1423/1-1 to C.G..

778

## 779 **References**

- 780 1. Flematti GR, Ghisalberti EL, Dixon KW, Trengove RD. A compound from smoke that  
781 promotes seed germination. *Science*. 2004;305(5686):977. doi: 10.1126/science.1099944.  
782 2. Nelson DC, Riseborough JA, Flematti GR, Stevens J, Ghisalberti EL, Dixon KW, et al.  
783 Karrikins discovered in smoke trigger Arabidopsis seed germination by a mechanism  
784 requiring gibberellic acid synthesis and light. *Plant Physiol*. 2009;149(2):863-73. doi:  
785 10.1104/pp.108.131516.  
786 3. Nelson DC, Scaffidi A, Dun EA, Waters MT, Flematti GR, Dixon KW, et al. F-box  
787 protein MAX2 has dual roles in karrikin and strigolactone signaling in *Arabidopsis thaliana*.  
788 *Proc Natl Acad Sci USA*. 2011;108(21):8897-902. doi: 10.1073/pnas.1100987108.  
789 4. Waters MT, Nelson DC, Scaffidi A, Flematti GR, Sun YK, Dixon KW, et al.  
790 Specialisation within the DWARF14 protein family confers distinct responses to karrikins and  
791 strigolactones in Arabidopsis. *Development*. 2012;139(7):1285-95. doi: 10.1242/dev.074567.  
792 5. Guo Y, Zheng Z, La Clair JJ, Chory J, Noel JP. Smoke-derived karrikin perception by  
793 the  $\alpha/\beta$ -hydrolase KAI2 from Arabidopsis. *Proc Natl Acad Sci U S A*. 2013;110(20):8284-9.  
794 doi: doi/10.1073/pnas.1306265110.  
795 6. Kagiya M, Hirano Y, Mori T, Kim SY, Kyojuka J, Seto Y, et al. Structures of D14  
796 and D14L in the strigolactone and karrikin signaling pathways. *Genes Cells*. 2013;18(2):147-  
797 60. Epub 2013/01/11. doi: 10.1111/gtc.12025.  
798 7. Zheng J, Hong K, Zeng L, Wang L, Kang S, Qu M, et al. Karrikin signaling acts parallel  
799 to and additively with strigolactone signaling to regulate rice mesocotyl elongation in  
800 darkness. *Plant Cell*. 2020. Epub 2020/07/16. doi: 10.1105/tpc.20.00123.

- 801 8. Khosla A, Morffy N, Li Q, Faure L, Chang SH, Yao J, et al. Structure-function analysis  
802 of SMAX1 reveals domains that mediate its karrikin-induced proteolysis and interaction with  
803 the receptor KAI2. *Plant Cell*. 2020;32(8):2639-59. Epub 2020/05/22. doi:  
804 10.1105/tpc.19.00752.
- 805 9. Toh S, Holbrook-Smith D, Stokes ME, Tsuchiya Y, McCourt P. Detection of parasitic  
806 plant suicide germination compounds using a high-throughput Arabidopsis HTL/KAI2  
807 strigolactone perception system. *Chem & Biol*. 2014;21(9):1253. doi:  
808 10.1016/j.chembiol.2014.09.003.
- 809 10. Hrdlička J, Gucký T, Novák O, Kulkarni M, Gupta S, van Staden J, et al. Quantification  
810 of karrikins in smoke water using ultra-high performance liquid chromatography–tandem  
811 mass spectrometry. *Plant Methods*. 2019;15(1):81. doi: 10.1186/s13007-019-0467-z.
- 812 11. Nelson DC, Flematti GR, Ghisalberti EL, Dixon KW, Smith SM. Regulation of seed  
813 germination and seedling growth by chemical signals from burning vegetation. *Annu Rev*  
814 *Plant Biol*. 2012;63:107-30. Epub 2012/03/13. doi: 10.1146/annurev-arplant-042811-105545.
- 815 12. Conn CE, Nelson DC. Evidence that KARRIKIN-INSENSITIVE2 (KAI2) receptors may  
816 perceive an unknown signal that is not karrikin or strigolactone. *Front Plant Sci*. 2016;6:1219.  
817 Epub 2016/01/19. doi: 10.3389/fpls.2015.01219.
- 818 13. Li W, Nguyen KH, Chu HD, Ha CV, Watanabe Y, Osakabe Y, et al. The karrikin  
819 receptor KAI2 promotes drought resistance in *Arabidopsis thaliana*. *PLoS Genet*.  
820 2017;13(11):e1007076. Epub 2017/11/14. doi: 10.1371/journal.pgen.1007076.
- 821 14. Swarbreck SM, Guerringue Y, Matthus E, Jamieson FJC, Davies JM. Impairment in  
822 karrikin but not strigolactone sensing enhances root skewing in *Arabidopsis thaliana*. *Plant J*.  
823 2019;(98):607-21. Epub 2019/01/20. doi: 10.1111/tpj.14233.
- 824 15. Villaecija Aguilar JA, Hamon-Josse M, Carbonnel S, Kretschmar A, Schmid C, Dawid  
825 C, et al. SMAX1/SMXL2 regulate root and root hair development downstream of KAI2-  
826 mediated signalling in Arabidopsis. *PLoS Genet*. 2019;15(8):1-27. doi:  
827 10.1371/journal.pgen.1008327.
- 828 16. Gutjahr C, Gobbato E, Choi J, Riemann M, Johnston MG, Summers W, et al. Rice  
829 perception of symbiotic arbuscular mycorrhizal fungi requires the karrikin receptor complex.  
830 *Science*. 2015;350(6267):1521-4. doi: 10.1126/science.aac9715.
- 831 17. Choi J, Lee T, Cho J, Servante EK, Pucker B, Summers W, et al. The negative  
832 regulator SMAX1 controls mycorrhizal symbiosis and strigolactone biosynthesis in rice. *Nat*  
833 *Commun*. 2020;11(1):2114. Epub 2020/05/02. doi: 10.1038/s41467-020-16021-1.
- 834 18. Sun YK, Flematti GR, Smith SM, Waters MT. Reporter gene-facilitated detection of  
835 compounds in Arabidopsis leaf extracts that activate the karrikin signaling pathway. *Front*  
836 *Plant Sci*. 2016;7:1799. Epub 2016/12/21. doi: 10.3389/fpls.2016.01799.
- 837 19. Cook CE, Whichard LP, Turner B, Wall ME, Egley GH. Germination of witchweed  
838 (*Striga lutea* Lour.): isolation and properties of a potent stimulant. *Science*.  
839 1966;154(3753):1189-90. doi: DOI: 10.1126/science.154.3753.1189.
- 840 20. Akiyama K, Matsuzaki K, Hayashi H. Plant sesquiterpenes induce hyphal branching  
841 in arbuscular mycorrhizal fungi. *Nature*. 2005;435(7043):824-7. doi: 10.1038/nature03608.
- 842 21. Besserer A, Puech-Pages V, Kiefer P, Gomez-Roldan V, Jauneau A, Roy S, et al.  
843 Strigolactones stimulate arbuscular mycorrhizal fungi by activating mitochondria. *PLoS Biol*.  
844 2006;4(7):e226. Epub 2006/06/22. doi: 10.1371/journal.pbio.0040226.

- 845 22. Gomez-Roldan V, Fermas S, Brewer PB, Puech-Pages V, Dun EA, Pillot JP, et al.  
846 Strigolactone inhibition of shoot branching. *Nature*. 2008;455(7210):189-94. doi:  
847 10.1038/nature07271.
- 848 23. Umehara M, Hanada A, Yoshida S, Akiyama K, Arite T, Takeda-Kamiya N, et al.  
849 Inhibition of shoot branching by new terpenoid plant hormones. *Nature*. 2008;455(7210):195-  
850 200. doi: 10.1038/nature07272.
- 851 24. Agustí J, Herold S, Schwarz M, Sanchez P, Ljung K, Dun EA, et al. Strigolactone  
852 signaling is required for auxin-dependent stimulation of secondary growth in plants. *Proc Natl*  
853 *Acad Sci U S A*. 2011;108(50):20242-7. Epub 2011/11/30. doi: 10.1073/pnas.1111902108.
- 854 25. Swarbreck SM, Mohammad-Sidik A, Davies JM. Common components of the  
855 strigolactone and karrikin signaling pathways suppress root branching in *Arabidopsis*  
856 *thaliana*. *Plant Physiol*. 2020. Epub 2020/07/22. doi: 10.1104/pp.19.00687.
- 857 26. Hamiaux C, Drummond RS, Janssen BJ, Ledger SE, Cooney JM, Newcomb RD, et  
858 al. DAD2 is an alpha/beta hydrolase likely to be involved in the perception of the plant  
859 branching hormone, strigolactone. *Curr Biol*. 2012;22(21):2032-6. Epub 2012/09/11. doi:  
860 10.1016/j.cub.2012.08.007.
- 861 27. Waters MT, Scaffidi A, Flematti GR, Smith SM. Substrate-induced degradation of the  
862 alpha/beta-fold hydrolase KARRIKIN INSENSITIVE2 requires a functional catalytic triad but  
863 is independent of MAX2. *Mol Plant*. 2015;8(5):814-7. doi: 10.1016/j.molp.2014.12.020.
- 864 28. Soundappan I, Bennett T, Morffy N, Liang Y, Stanga JP, Abbas A, et al. SMAX1-  
865 LIKE/D53 family members enable distinct MAX2-dependent responses to strigolactones and  
866 karrikins in *Arabidopsis*. *Plant Cell*. 2015;27(11):3143-59. doi: 10.1105/tpc.15.00562.
- 867 29. Wang L, Wang B, Jiang L, Liu X, Li X, Lu Z, et al. Strigolactone signaling in *Arabidopsis*  
868 regulates shoot development by targeting D53-Like SMXL repressor proteins for  
869 ubiquitination and degradation. *Plant Cell*. 2015;27(11):3128-42. doi: 10.1105/tpc.15.00605.
- 870 30. Zhou F, Lin Q, Zhu L, Ren Y, Zhou K, Shabek N, et al. D14-SCF(D3)-dependent  
871 degradation of D53 regulates strigolactone signalling. *Nature*. 2013;504(7480):406-10. doi:  
872 10.1038/nature12878.
- 873 31. Jiang L, Liu X, Xiong G, Liu H, Chen F, Wang L, et al. DWARF 53 acts as a repressor  
874 of strigolactone signalling in rice. *Nature*. 2013;504(7480):401-5. doi: 10.1038/nature12870.
- 875 32. Bythell-Douglas R, Rothfels CJ, Stevenson DWD, Graham SW, Wong GK, Nelson DC,  
876 et al. Evolution of strigolactone receptors by gradual neo-functionalization of KAI2  
877 paralogues. *BMC Biol*. 2017;15(1):52. doi: 10.1186/s12915-017-0397-z.
- 878 33. Végh A, Incze N, Fábrián A, Huo H, Bradford KJ, Balázs E, et al. Comprehensive  
879 analysis of *DWARF14-LIKE2 (DLK2)* reveals its functional divergence from strigolactone-  
880 related paralogs. *Front Plant Sci*. 2017;8(1641):1-14. doi: 10.3389/fpls.2017.01641.
- 881 34. Waters MT, Scaffidi A, Moulin SL, Sun YK, Flematti GR, Smith SM. A *Selaginella*  
882 *moellendorffii* ortholog of KARRIKIN INSENSITIVE2 functions in *Arabidopsis* development  
883 but cannot mediate responses to karrikins or strigolactones. *Plant Cell*. 2015;27(7):1925-44.  
884 doi: 10.1105/tpc.15.00146.
- 885 35. Waters MT, Gutjahr C, Bennett T, Nelson DC. Strigolactone signaling and evolution.  
886 *Annu Rev Plant Biol*. 2017;68:291-322. doi: 10.1146/annurev-arplant-042916-040925.
- 887 36. Lopez-Raez JA, Charnikhova T, Gomez-Roldan V, Matusova R, Kohlen W, De Vos R,  
888 et al. Tomato strigolactones are derived from carotenoids and their biosynthesis is promoted  
889 by phosphate starvation. *New Phytol*. 2008;178(4):863-74. Epub 2008/03/19. doi:  
890 10.1111/j.1469-8137.2008.02406.x.

- 891 37. Bürger M, Mashiguchi K, Lee HJ, Nakano M, Takemoto K, Seto Y, et al. Structural  
892 basis of karrikin and non-natural strigolactone perception in *Physcomitrella patens*. Cell Rep.  
893 2019;26(4):855-65. doi: 10.1016/j.celrep.2019.01.003.
- 894 38. Conn CE, Bythell-Douglas R, Neumann D, Yoshida S, Whittington B, Westwood JH,  
895 et al. Convergent evolution of strigolactone perception enabled host detection in parasitic  
896 plants. Science. 2015;349(6247):540-3. doi: 10.1126/science.aab1140.
- 897 39. Toh S, Holbrook-Smith D, Stogios PJ, Onopriyenko O, Lumba S, Tsuchiya Y, et al.  
898 Structure-function analysis identifies highly sensitive strigolactone receptors in *Striga*.  
899 Science. 2015;350(6257):203-7. Epub 2015/10/10. doi: 10.1126/science.aac9476.
- 900 40. Sun YK, Yao J, Scaffidi A, Melville KT, Davies SF, Bond CS, et al. Divergent receptor  
901 proteins confer responses to different karrikins in two ephemeral weeds. Nat Commun.  
902 2020;11(1):1264. Epub 2020/03/11. doi: 10.1038/s41467-020-14991-w.
- 903 41. Wojciechowski MF, Lavin M, Sanderson MJ. A phylogeny of legumes (Leguminosae)  
904 based on analysis of the plastid *matK* gene resolves many well-supported subclades within  
905 the family. American J Bot. 2004;91(11):1846-62. doi: 10.3732/ajb.91.11.1846.
- 906 42. Shen H, Luong P, Huq E. The F-box protein MAX2 functions as a positive regulator of  
907 photomorphogenesis in *Arabidopsis*. Plant Physiol. 2007;145(4):1471-83. doi:  
908 10.1104/pp.107.107227.
- 909 43. Stirnberg P, Furner IJ, Ottoline Leyser HM. MAX2 participates in an SCF complex  
910 which acts locally at the node to suppress shoot branching. Plant J. 2007;50(1):80-94. doi:  
911 10.1111/j.1365-313X.2007.03032.x.
- 912 44. Nelson DC, Flematti GR, Riseborough JA, Ghisalberti EL, Dixon KW, Smith SM.  
913 Karrikins enhance light responses during germination and seedling development in  
914 *Arabidopsis thaliana*. Proc Natl Acad Sci USA. 2010;107(15):7095-100. doi:  
915 10.1073/pnas.0911635107.
- 916 45. Scaffidi A, Waters MT, Sun YK, Skelton BW, Dixon KW, Ghisalberti EL, et al.  
917 Strigolactone hormones and their stereoisomers signal through two related receptor proteins  
918 to induce different physiological responses in *Arabidopsis*. Plant Physiol. 2014;165(3):1221-  
919 32. doi: 10.1104/pp.114.240036.
- 920 46. Wang L, Xu Q, Yu H, Ma H, Li X, Yang J, et al. Strigolactone and karrikin signaling  
921 pathways elicit ubiquitination and proteolysis of SMXL2 to regulate hypocotyl elongation in  
922 *Arabidopsis*. Plant Cell. 2020;32(7):2251-70. Epub 2020/05/03. doi: 10.1105/tpc.20.00140.
- 923 47. Yao J, Mashiguchi K, Scaffidi A, Akatsu T, Melville KT, Morita R, et al. An allelic series  
924 at the *KARRIKIN INSENSITIVE 2* locus of *Arabidopsis thaliana* decouples ligand hydrolysis  
925 and receptor degradation from downstream signalling. Plant J. 2018;96(1):75-89. Epub  
926 2018/07/10. doi: 10.1111/tpj.14017.
- 927 48. Abe S, Sado A, Tanaka K, Kisugi T, Asami K, Ota S, et al. Carlactone is converted to  
928 carlactonoic acid by MAX1 in *Arabidopsis* and its methyl ester can directly interact with AtD14  
929 in vitro. Proc Natl Acad Sci U S A. 2014;111(50):18084-9. Epub 2014/11/27. doi:  
930 10.1073/pnas.1410801111.
- 931 49. de Saint Germain A, Retailleau P, Norsikian S, Servajean V, Pelissier F, Steinmetz V,  
932 et al. Contalactone, a contaminant formed during chemical synthesis of the strigolactone  
933 reference GR24 is also a strigolactone mimic. Phytochemistry. 2019;168:112112. Epub  
934 2019/09/10. doi: 10.1016/j.phytochem.2019.112112.

- 935 50. Seto Y, Yasui R, Kameoka H, Tamiru M, Cao M, Terauchi R, et al. Strigolactone  
936 perception and deactivation by a hydrolase receptor DWARF14. *Nat Commun.*  
937 2019;10(1):191. Epub 2019/01/16. doi: 10.1038/s41467-018-08124-7.
- 938 51. Leebens-Mack JH, Barker MS, Carpenter EJ, Deyholos MK, Gitzendanner MA,  
939 Graham SW, et al. One thousand plant transcriptomes and the phylogenomics of green  
940 plants. *Nature.* 2019;574(7780):679-85. doi: 10.1038/s41586-019-1693-2.
- 941 52. Malolepszy A, Mun T, Sandal N, Gupta V, Dubin M, Urbanski D, et al. The *LORE1*  
942 insertion mutant resource. *Plant J.* 2016;88(2):306-17. doi: 10.1111/tpj.13243.
- 943 53. Fukai E, Soyano T, Umehara Y, Nakayama S, Hirakawa H, Tabata S, et al.  
944 Establishment of a *Lotus japonicus* gene tagging population using the exon-targeting  
945 endogenous retrotransposon *LORE1*. *Plant J.* 2012;69(4):720-30. doi: 10.1111/j.1365-  
946 313X.2011.04826.x.
- 947 54. Perry JA, Wang TL, Welham TJ, Gardner S, Pike JM, Yoshida S, et al. A TILLING  
948 reverse genetics tool and a web-accessible collection of mutants of the legume *Lotus*  
949 *japonicus*. *Plant Physiol.* 2003;131(3):866-71. doi: 10.1104/pp.102.017384.
- 950 55. Beveridge CA, Ross JJ, Murfet IC. Branching in pea (action of genes *Rms3* and  
951 *Rms4*). *Plant Physiol.* 1996;110(3):859-65.
- 952 56. Ishikawa S, Maekawa M, Arite T, Onishi K, Takamure I, Kyojuka J. Suppression of  
953 tiller bud activity in tillering dwarf mutants of rice. *Plant Cell Physiol.* 2005;46(1):79-86. doi:  
954 10.1093/pcp/pci022.
- 955 57. Ruyter-Spira C, Kohlen W, Charnikhova T, van Zeijl A, van Bezouwen L, de Ruijter N,  
956 et al. Physiological effects of the synthetic strigolactone analog GR24 on root system  
957 architecture in Arabidopsis: another belowground role for strigolactones? *Plant Physiol.*  
958 2011;155(2):721-34. doi: 10.1104/pp.110.166645.
- 959 58. Jiang L, Matthys C, Marquez-Garcia B, De Cuyper C, Smet L, De Keyser A, et al.  
960 Strigolactones spatially influence lateral root development through the cytokinin signaling  
961 network. *J Exp Bot.* 2016;67(1):379-89. doi: 10.1093/jxb/erv478.
- 962 59. De Cuyper C, Fromentin J, Yocgo RE, De Keyser A, Guillotin B, Kunert K, et al. From  
963 lateral root density to nodule number, the strigolactone analogue GR24 shapes the root  
964 architecture of *Medicago truncatula*. *J Exp Bot.* 2015;66(1):137-46. doi: 10.1093/jxb/eru404.
- 965 60. Halouzka R, Tarkowski P, Zwanenburg B, Cavar Zeljkovic S. Stability of strigolactone  
966 analog GR24 toward nucleophiles. *Pest Manag Sci.* 2018;74(4):896-904. doi:  
967 10.1002/ps.4782.
- 968 61. Mayzlish-Gati E, LekKala SP, Resnick N, Wininger S, Bhattacharya C, Lemcoff JH, et  
969 al. Strigolactones are positive regulators of light-harvesting genes in tomato. *J Exp Bot.*  
970 2010;61(11):3129-36. doi: 10.1093/jxb/erq138.
- 971 62. Mashiguchi K, Sasaki E, Shimada Y, Nagae M, Ueno K, Nakano T, et al. Feedback-  
972 regulation of strigolactone biosynthetic genes and strigolactone-regulated genes in  
973 Arabidopsis. *Biosci Biotechnol Biochem.* 2009;73(11):2460-5. doi: 10.1271/bbb.90443.
- 974 63. Wong MML, Vaillancourt RE, Freeman JS, Hudson CJ, Bakker FT, Cannon CH, et al.  
975 Novel insights into karyotype evolution and whole genome duplications in legumes. *BioRxiv*  
976 099044; 2017.
- 977 64. Zhao L, Zhou XE, Wu Z, Yi W, Xu Y, Li S, et al. Crystal structures of two phytohormone  
978 signal-transducing  $\alpha/\beta$  hydrolases: karrikin-signaling KAI2 and strigolactone-signaling  
979 DWARF14. *Cell Res.* 2013;23(3):436-9. Epub 2013/02/05. doi: 10.1038/cr.2013.19.

- 980 65. Xu Y, Miyakawa T, Nakamura H, Nakamura A, Imamura Y, Asami T, et al. Structural  
981 basis of unique ligand specificity of KAI2-like protein from parasitic weed *Striga hermonthica*.  
982 Sci Rep. 2016;6:31386. doi: 10.1038/srep31386.
- 983 66. Carbonnel S, Das D, Varshney K, Kolodziej MC, Villaécija-Aguilar JA, Gutjahr C. The  
984 karrikin signaling regulator SMAX1 controls *Lotus japonicus* root and root hair development  
985 by suppressing ethylene biosynthesis. Proc Natl Acad Sci USA. 2020: 117:21757-21765. doi:  
986 10.1073/pnas.2006111117.
- 987 67. Mayzlish-Gati E, De-Cuyper C, Goormachtig S, Beeckman T, Vuylsteke M, Brewer  
988 PB, et al. Strigolactones are involved in root response to low phosphate conditions in  
989 Arabidopsis. Plant Physiol. 2012;160(3):1329-41. doi: 10.1104/pp.112.202358.
- 990 68. Madmon O, Mazuz M, Kumari P, Dam A, Ion A, Mayzlish-Gati E, et al. Expression of  
991 *MAX2* under *SCARECROW* promoter enhances the strigolactone/*MAX2* dependent  
992 response of Arabidopsis roots to low-phosphate conditions. Planta. 2016;243(6):1419-27.  
993 Epub 2016/02/28. doi: 10.1007/s00425-016-2477-7.
- 994 69. Sun X, Ni M. HYPOSENSITIVE TO LIGHT, an alpha/beta fold protein, acts  
995 downstream of ELONGATED HYPOCOTYL 5 to regulate seedling de-etiolation. Mol Plant.  
996 2011;4(1):116-26. doi: 10.1093/mp/ssq055.
- 997 70. Urbański DF, Małolepszy A, Stougaard J, Andersen SU. Genome-wide *LORE1*  
998 retrotransposon mutagenesis and high-throughput insertion detection in *Lotus japonicus*.  
999 Plant J. 2012;69(4):731-41. doi: 10.1111/j.1365-313X.2011.04827.x.
- 1000 71. Pimprikar P, Carbonnel S, Paries M, Katzer K, Klingl V, Bohmer MJ, et al. A CCaMK-  
1001 CYCLOPS-DELLA complex activates transcription of *RAM1* to regulate arbuscule branching.  
1002 Curr Biol. 2016;26(8):987-98. doi: 10.1016/j.cub.2016.01.069.
- 1003 72. Kumar S, Stecher G, Li M, Knyaz C, Tamura K. MEGA X: Molecular evolutionary  
1004 genetics analysis across computing platforms. Mol Biol Evol. 2018;35(6):1547-9. Epub  
1005 2018/05/04. doi: 10.1093/molbev/msy096.
- 1006 73. Trifinopoulos J, Nguyen L, von Haeseler A, Minh BQ. W-IQ-TREE: a fast online  
1007 phylogenetic tool for maximum likelihood analysis. Nucleic Acids Res. 2016;44(W1):W232-  
1008 W5. doi: 10.1093/nar/gkw256.
- 1009 74. Binder A, Lambert J, Morbitzer R, Popp C, Ott T, Lahaye T, et al. A modular plasmid  
1010 assembly kit for multigene expression, gene silencing and silencing rescue in plants. PLoS  
1011 One. 2014;9(2):1-14. doi: 10.1371/journal.pone.0088218.
- 1012 75. Matsuo K, Shindo M. Efficient synthesis of karrikinolide via Cu(II)-catalyzed  
1013 lactonization. Tetrahedron. 2011;67(5):971-5. doi: 10.1016/j.tet.2010.11.108.
- 1014 76. Irizarry RA, Hobbs B, Collin F, Beazer-Barclay YD, Antonellis KJ, Scherf U, et al.  
1015 Exploration, normalization, and summaries of high density oligonucleotides array probe level  
1016 data. Biostatistics. 2003;4(2):249-64. doi: 10.1093/biostatistics/4.2.249 %J Biostatistics.
- 1017 77. Gentleman RC, Carey VJ, Bates DM, Bolstad B, Dettling M, Dudoit S, et al.  
1018 Bioconductor: open software development for computational biology and bioinformatics.  
1019 Genome Biol. 2004;5(10):R80-R. Epub 2004/09/15. doi: 10.1186/gb-2004-5-10-r80.
- 1020 78. Gautier L, Cope L, Bolstad BM, Irizarry RA. affy—analysis of Affymetrix GeneChip  
1021 data at the probe level. Bioinfo. 2004;20(3):307-15. doi: 10.1093/bioinformatics/btg405 %J  
1022 Bioinformatics.
- 1023 79. Smyth GK. limma: Linear Models for Microarray Data. In: Gentleman RC, Carey VJ,  
1024 Huber W, Irizarry RA, Dudoit S, editors. Bioinformatics and computational biology solutions  
1025 using R and Bioconductor. New York, NY: Springer New York; 2005. p. 397-420.

1026 80. Smyth GK. Linear models and empirical bayes methods for assessing differential  
1027 expression in microarray experiments. *Statist Appl Genet Mol Biol*. 2004;3(1):1-26. Epub  
1028 2006/05/02. doi: 10.2202/1544-6115.1027.  
1029 81. Czechowski T, Bari RP, Stitt M, Scheible W, Udvardi MK. Real-time RT-PCR profiling  
1030 of over 1400 Arabidopsis transcription factors: unprecedented sensitivity reveals novel root-  
1031 and shoot-specific genes. *Plant J*. 2004;38(2):366-79. doi: 10.1111/j.1365-  
1032 313X.2004.02051.x.  
1033

## 1034 **Figure legends**

### 1035 **Figure 1. The KAI2 gene underwent duplication prior to diversification of the legumes.**

1036 Phylogenetic tree of KAI2 and D14 rooted with bacterial RbsQ from indicated species (*Lotus*  
1037 *japonicus*; *Glycine max*; *Pisum sativum*; *Medicago truncatula*; *Arabidopsis thaliana*; *Populus*  
1038 *trichocarpa*; *Oryza sativa*; *Zea mays*; *Sorghum bicolor*; *Marchantia polymorpha*). MEGAX  
1039 was used to align the protein sequences with MUSCLE and generate a tree inferred by  
1040 Maximum Likelihood method [72]. The tree with the highest log likelihood (-7359.19) is  
1041 shown. The percentage of trees in which the associated taxa clustered together is shown  
1042 next to the branches. Values below 50 were ignored. *KAI2* duplication in the legumes is  
1043 highlighted by red and blue branches.

1044

### 1045 **Figure 2. *Lotus japonicus* D14, KAI2a and KAI2b can replace D14 and KAI2 in** 1046 ***Arabidopsis*, respectively.**

1047 (A) Hypocotyl length of *A. thaliana* wild-type (Ler), *kai2-2* and *kai2-2* lines complemented by  
1048 *AtD14*, *AtKAI2*, *LjD14*, *LjKAI2a* and *LjKAI2b*, driven by the *AtKAI2* promoter at 6 days post  
1049 germination (dpg). Seedlings were grown in 8h light / 16h dark periods (n=37-122). (B)  
1050 Shoots of *A. thaliana* *d14-1*, with an empty vector (EV) or complemented with *AtD14*, *AtKAI2*,  
1051 *LjD14*, *LjKAI2a* and *LjKAI2b*, driven by the *AtD14* promoter at 26 dpg. Scale bar = 10 cm. (C)  
1052 Rosette branch number at 26 dpg of *A. thaliana* wild-type (Col-0), *d14-1* and *d14-1* lines



1053 carrying an empty vector (EV) or plasmids containing *AtD14*, *AtKAI2*, *LjD14*, *LjKAI2a* and  
1054 *LjKAI2b*, driven by the *AtD14* promoter (n=24). Letters indicate different statistical groups  
1055 (ANOVA, post-hoc Tukey test).

1056

1057 **Figure 3. *Lotus japonicus* KAI2a, KAI2b and rice D14L confer divergent hypocotyl**  
1058 **growth responses to KAR<sub>1</sub> and KAR<sub>2</sub> in Arabidopsis.**

1059 (A) Structures of KAR<sub>1</sub>, KAR<sub>2</sub>, GR24<sup>5DS</sup> and GR24<sup>ent-5DS</sup>. (B-C) Hypocotyl length of *A.*  
1060 *thaliana kai2* mutants complemented with *KAI2* from *A. thaliana*, *L. japonicus* and rice, after  
1061 treatment with solvent (Mock), 1 μM KAR<sub>1</sub> or KAR<sub>2</sub> at 6 dpv. (B) *Ler* wild-type, *kai2-2* and  
1062 *kai2-2* lines complemented with *AtKAI2*, *LjKAI2a* and *LjKAI2b*, driven by the *AtKAI2* promoter  
1063 (n= 33-128). (C) *Ler* and Col-0 wild-type, *htl-2* (*Ler*), K02821-line transgenic for *p35S:OsD14L*  
1064 (Col-0), and two homozygous F<sub>3</sub> lines from the *htl-2* x K02821 cross [16] (n= 80-138). (D)  
1065 Hypocotyl length of *A. thaliana* Col-0 wild-type, *d14-1 kai2-2* double mutants, and *d14-1 kai2-*  
1066 *2* lines complemented with *LjKAI2a* and *LjKAI2b*, driven by the *AtKAI2* promoter after  
1067 treatment with solvent (Mock), 1 μM GR24<sup>5DS</sup> or GR24<sup>ent-5DS</sup> (n= 59-134). (B-D) Seedlings  
1068 were grown in 8h light / 16h dark periods. Letters indicate different statistical groups (ANOVA,  
1069 post-hoc Tukey test).

1070

1071 **Figure 4. Binding of GR24<sup>ent-5DS</sup> to LjKAI2a is determined by three amino acids.**

1072 (A) The ligand-binding cavity regions of *LjKAI2a* and *LjKAI2b* proteins after structural  
1073 homology modelling on the KAI2 crystal structure of *A. thaliana* [5]. Conserved residues in  
1074 the cavity that differ between the KAI2a and KAI2b clades, and that are also different between  
1075 *LjKAI2b* and *AtKAI2*, are shown in green. The phenylalanine residue in *LjKAI2a*, which is

1076 changed to tryptophan in *LjKAI2b*, is shown in violet. The catalytic triad is coloured in red. **(B)**  
1077 DSF curves of purified SUMO fusion proteins of wild-type *LjKAI2a* and *LjKAI2b*, and versions  
1078 with swapped amino acids *LjKAI2a*<sup>M160,L190</sup>, *LjKAI2b*<sup>L161,S191</sup>, *LjKAI2a*<sup>W157,M160,L190</sup>,  
1079 *LjKAI2b*<sup>F158,L161,S191</sup>, *LjKAI2a*<sup>W157</sup>, *LjKAI2b*<sup>F158</sup> at the indicated concentrations of of GR24<sup>ent-</sup>  
1080 <sup>5DS</sup>. The first derivative of the change of fluorescence was plotted against the temperature.  
1081 Each curve is the arithmetic mean of three sets of reactions, each comprising four technical  
1082 replicates. Peaks indicate the protein melting temperature. The shift of the peak in *LjKAI2a*  
1083 indicates ligand-induced thermal destabilisation consistent with a protein-ligand interaction.  
1084 Insets plot the minimum value of (-dF/dT) at the melting point of the protein as determined in  
1085 the absence of ligand (means ± SE, n = 3). Asterisks indicate significant differences to the  
1086 solvent control (ANOVA, post-hoc Dunnett test, N.S.>0.05, \*≤0.05, \*\*≤0.01, \*\*\*≤0.001,  
1087 \*\*\*\*≤0.0001).

1088

1089 **Figure 5. Amino acid swaps reverse sensitivity of *LjKAI2a* and *LjKAI2b* to GR24<sup>ent-5DS</sup>**  
1090 **in *Arabidopsis hypocotyls*.**

1091 Hypocotyl length of *A. thaliana* Col-0 wild-type, *d14-1 kai2-2* double mutants, and *d14-1 kai2-*  
1092 *2* lines complemented with *LjKAI2a* and *LjKAI2b* variants driven by the *AtKAI2* promoter and  
1093 after treatment with solvent (Mock), 1 μM GR24<sup>5DS</sup> or GR24<sup>ent-5DS</sup>. **(A)** *LjKAI2a*<sup>M160,L190</sup> and  
1094 *LjKAI2a*<sup>W157,M160,L190</sup> (n = 46-84). **(B)** *LjKAI2b*<sup>L161,S191</sup> and *LjKAI2b*<sup>F158,L161,S191</sup> (n= 49-102). **(A-**  
1095 **B)** Seedlings were grown in 8h light / 16h dark periods Asterisks indicate significant  
1096 differences versus mock treatment (Welch t.test, \*≤0.05, \*\*≤0.01, \*\*\*≤0.001, \*\*\*\*≤0.0001).

1097

1098 **Figure 6. Role of *D14*, *KAI2a*, *KAI2b* and *MAX2* in shoot and hypocotyl development of**  
1099 ***Lotus japonicus*.**

1100 (A) Schematic representation of the *L. japonicus* *D14*, *KAI2a*, *KAI2b* and *MAX2* genes. Black  
1101 boxes and lines show exons and introns, respectively. *LORE1* insertions are indicated by red  
1102 triangles and EMS mutations by red stars. (B) Shoot phenotype of *L. japonicus* wild-type and  
1103 karrikin and strigolactone perception mutants at 8 weeks post germination (wpg). Scale bars:  
1104 7 cm. (C) Number of branches and of *L. japonicus* wild-type, karrikin and strigolactone  
1105 perception mutants at 7 wpg (n = 12-21). (D) Leaf size of the indicated genotypes at 9 wpg  
1106 (n = 12-15 plants with an average of 3 leaves). (E) Hypocotyl length of the indicated  
1107 genotypes of *L. japonicus* under short day conditions (8h light/ 16h dark) at 1 wpg (n = 79-  
1108 97). (C-E) Letters indicate different statistical groups (ANOVA, post-hoc Tukey test).

1109

1110 **Figure 7. *Lotus japonicus* root system architecture is affected specifically by treatment**  
1111 **with *KAR*<sub>1</sub> but not *KAR*<sub>2</sub>.**

1112 (A) Primary root length (PRL), post-embryonic root (PER) number and PER density of wild-  
1113 type plants 2 wpg after treatment with solvent (M) or three different concentrations of *KAR*<sub>1</sub>,  
1114 *KAR*<sub>2</sub> or *rac*-GR24 (GR24) (n = 32-57). (B) PER density of wild-type plants at 2 wpg and  
1115 treated with solvent (Mock) 1  $\mu$ M *KAR*<sub>1</sub>, 1  $\mu$ M *KAR*<sub>2</sub>, or 1  $\mu$ M *rac*-GR24 (n = 43-51). Plants  
1116 were transferred onto fresh hormone-containing medium after 5 days. (C-D) qRT-PCR-based  
1117 expression of *DLK2* normalized to *Ubiquitin* expression in roots at 2 wpg after 2 hours  
1118 treatment with solvent (Mock), (C) 1  $\mu$ M *KAR*<sub>1</sub> and 1  $\mu$ M *KAR*<sub>2</sub>, (D) 1  $\mu$ M *rac*-GR24 (n = 4).  
1119 (A and C) Letters indicate different statistical groups (ANOVA, post-hoc Tukey test). (B)  
1120 Asterisks indicate significant differences (ANOVA, Dunnett test, N.S.>0.05, \* $\leq$ 0.05). (D)

1121 Asterisk indicate significant differences versus mock treatment (Welch t.test, \* $\leq$ 0.05, \*\* $\leq$ 0.01,  
1122 \*\*\* $\leq$ 0.001).

1123

1124 **Figure 8. *LjKAI2a* and *LjKAI2b* operate redundantly in the response of roots to KAR<sub>1</sub>**

1125 (A) Post-embryonic-root (PER) density of *L. japonicus* plants, 2 wpg after treatment with  
1126 solvent (M) or 3  $\mu$ M KAR<sub>1</sub> (n=34-72). (B-C) qRT-PCR-based expression of *DLK2* in roots of  
1127 *L. japonicus* plants at 2 wpg after 2 hours treatment with solvent (Mock) or (B) 3  $\mu$ M KAR<sub>1</sub> or  
1128 (C) 1 $\mu$ M GR24<sup>ent-5DS</sup>. Expression values were normalized to those of the housekeeping gene  
1129 *Ubiquitin* (n= 3-4). (A-C) Asterisks indicate significant differences versus mock treatment  
1130 (Welch t.test, \* $\leq$ 0.05, \*\* $\leq$ 0.01, \*\*\* $\leq$ 0.001).

1131

1132 **Figure 9. *L. japonicus* KAI2a and KAI2b display organ-specific redundancy and differ**  
1133 **in their ligand-binding specificity.**

1134 (A) *LjKAI2a* is required to mediate inhibition of hypocotyl growth in response to KAR<sub>1</sub> and  
1135 KAR<sub>2</sub>. In roots *LjKAI2a* and *LjKAI2b* redundantly promote lateral root density, but only in  
1136 response to KAR<sub>1</sub> treatment. (B) Upper panel: In the Arabidopsis *kai2-2* background *LjKAI2a*  
1137 mediates hypocotyl growth inhibition in response to KAR<sub>1</sub>, KAR<sub>2</sub> and GR24<sup>ent-5DS</sup>. In the same  
1138 background, *LjKAI2b* mediates a stronger response to KAR<sub>1</sub> than to KAR<sub>2</sub> and no response  
1139 to GR24<sup>ent-5DS</sup> (indicated by a red cross). Three divergent amino acids at the binding pocket  
1140 are indicated in white. Lower panel: Swapping the three divergent amino acids in the binding  
1141 pocket reconstitutes GR24<sup>ent-5DS</sup> activity through *LjKAI2b* and abolishes GR24<sup>ent-5DS</sup> activity  
1142 through *LjKAI2a*. Among the three amino acids F157/W158 are decisive for GR24<sup>ent-5DS</sup>  
1143 binding (strong colors), while L160/M161 and S190/L191 play a weaker role (pale colors).

1144 Amino acids from *LjKAI2a* have a red/pale red and amino acids from *LjKAI2b* a violet/pale  
1145 background.

1146

## 1147 **Supplementary figure legends**

### 1148 **S1 Fig. MAX2-like underwent pseudogenization.**

1149 **(A)** Schematic representation of the syntenic regions containing the *MAX2* and *MAX2-like*  
1150 loci in *L. japonicus*. Coloured arrows and black lines show exons and introns respectively.

1151 **(B)** Protein alignment of *LjMAX2*, *LjMAX2-like* and an artificial *LjMAX2-like* with a deletion of  
1152 the thymine at the position 453 in the coding sequence (*LjMAX2-like*  $\Delta$ T453). Position of the  
1153 nucleotide deletion is indicated in the translated sequence by a red triangle. Amino-acid  
1154 conservation between *MAX2* and *MAX2-like* is indicated by a dark background.

1155

### 1156 **S2 Fig. Organ-specific accumulation of *D14*, *KAI2a*, *KAI2b* and *MAX2* transcripts.**

1157 **(A-C)** Transcript accumulation in wild-type of *D14*, *KAI2a*, *KAI2b* and *MAX2* normalized to  
1158 expression of *Ubiquitin*, in **(A)** leaf, stem, flower and root of plants grown in pots, and in **(B)**  
1159 hypocotyl and roots of 1 wpg plants grown on Petri dishes in 8h light / 16h dark cycles, and  
1160 in **(c)** roots of 2 wpg plants grown on Petri dishes in 16h light / 8h dark cycles (n = 3).

1161

### 1162 **S3 Fig. Subcellular localisation of *LjD14*, *LjKAI2a*, *LjKAI2b* and *LjMAX2* in *Nicotiana* 1163 *benthamiana* leaves.**

1164 **(A)** Subcellular localization of *LjD14*, *LjKAI2a*, *LjKAI2b* and *LjMAX2* in *N. benthamiana* leaf  
1165 epidermal cells. *LjD14*, *LjKAI2a* and *LjKAI2b* are N-terminally fused with mOrange. *LjMAX2*  
1166 is N-terminally fused with T-Sapphire. Scale bars: 25  $\mu$ m. **(B)** Western blot of protein extracts

1167 from *N. benthamiana*, showing that the mOrange tag fused with *LjD14*, *LjKAI2a* and *LjKAI2b*  
1168 was not cleaved at detectable amounts.

1169

1170 **S4 Fig. SDS-PAGE of purified SUMO fusion proteins and DSF assay with GR24<sup>5DS</sup>.**

1171 (A) 200 pmol (approx. 8 µg) of purified proteins were separated by 12% SDS-PAGE  
1172 containing 2,2,2-trichlorethanol as a visualization agent. Below each lane is the calculated  
1173 protein size in kiloDaltons. S, protein size standards (Precision Plus Dual Color Standards,  
1174 Bio-Rad #1610394) with corresponding sizes in kDa shown on the left. Optimal exposures of  
1175 recombinant proteins and size standards were taken separately under UV transillumination  
1176 and red epi-illumination, respectively. The two images were merged in post-processing, and  
1177 the junction between them is indicated by a vertical line. (B) DSF curves of purified SUMO  
1178 fusion proteins of wild-type *LjKAI2a* and *LjKAI2b*, and versions with swapped amino acids  
1179 *LjKAI2a*<sup>W157,M160,L190</sup>, *LjKAI2b*<sup>F158,L161,S191</sup>, *LjKAI2a*<sup>W157</sup>, *LjKAI2b*<sup>F158</sup>, at the indicated  
1180 concentrations of GR24<sup>5DS</sup>. The first derivative of the change of fluorescence was plotted  
1181 against the temperature. Each curve is the arithmetic mean of four technical replicates. Peaks  
1182 indicate the protein melting temperature. There is no ligand-induced thermal destabilisation  
1183 consistent with no protein-ligand interaction.

1184

1185 **S5 Fig. Amino acid differences between the legume KAI2a and KAI2b clades.**

1186 Protein sequence alignment of KAI2a and KAI2b homologs from the legumes *Lotus*  
1187 *japonicus*, *Pisum sativum*, *Medicago truncatula* and *Glycine max*, in comparison with  
1188 *Arabidopsis* KAI2 and rice D14L. Residues conserved within the KAI2a and KAI2b clades but  
1189 different between these clades are coloured in green and blue. Residues of the catalytic triad

1190 are coloured in red. A non-conserved tryptophan in *LjKAI2b* located in the protein cavity is  
1191 coloured in violet. Yellow triangles indicated amino acid residues located in the ligand-binding  
1192 cavity of the proteins. Orange triangles indicate the three amino acids responsible for  
1193 differences in GR24<sup>ent-5DS</sup>-binding between *LjKAI2a* and *LjKAI2b*.

1194

1195 **S6 Fig. Intrinsic tryptophan fluorescence assay confirms inability of *LjKAI2b* to**  
1196 **interact with GR24<sup>ent-5DS</sup>**

1197 Intrinsic tryptophane fluorescence of wild-type *LjKAI2a* and *LjKAI2b*, and protein versions  
1198 with swapped amino acids *LjKAI2a*<sup>M160,L190</sup>, *LjKAI2b*<sup>L161,S191</sup>, *LjKAI2a*<sup>W157,M160,L190</sup>,  
1199 *LjKAI2b*<sup>F158,L161,S191</sup>, *LjKAI2a*<sup>W157</sup>, *LjKAI2b*<sup>F158</sup> measured with (A) fixed wavelength filters  
1200 (excitation 295/10 nm; longpass dichroic 325 nm; emission 360/20 nm) and (B) with a linear  
1201 variable filter monochromator for emission wavelength scans (excitation 295/10 nm, emission  
1202 334-400 nm, step width 2 nm, emission bandwidth 8 nm) at the indicated GR24<sup>ent-5DS</sup>  
1203 concentrations.

1204

1205 **S7 Fig. The F157 to W replacement occurred multiple times in angiosperm KAI2**  
1206 **proteins.**

1207 Phylogenetic tree of KAI2 proteins rooted with *A. thaliana* DLK2. The KAI2a and KAI2b clades  
1208 in legumes are highlighted by red and blue branches. Monophyletic groups corresponding to  
1209 a same order or clade are highlighted by colored rectangular boxes. Amino-acids at the  
1210 positions corresponding to AtKAI2 157, 160 and 190 are indicated with single-letter code. A  
1211 black background indicates the presence of the most common residues in KAI2 proteins:  
1212 F157, L160 and A190. A blue background indicates residues M160 and L190, conserved in

1213 legume KAI2b. A red background indicates S190, conserved in legume KAI2a. A green  
1214 background indicates a W at position 157. A brown background indicates a different residue.

1215

1216 **S8 Fig. Transcript accumulation in the *L. japonicus* KAR and SL receptor mutants.**

1217 (A) qRT-PCR based transcript accumulation of *LjKAI2a* and *LjKAI2b*, in roots of wild type and  
1218 *kai2a-1*, *kai2b-1*, *kai2b-3*, *kai2a-1 kai2b-1* and *max2-4* as well as *LjMAX2* and *LjD14* in *max2-*  
1219 *4* and *d14-1*, respectively (n=4). Expression values were normalized to those of the  
1220 housekeeping gene *Ubiquitin*. (B) *LjKAI2b* transcript accumulation in wild-type, *kai2b-1* (stop  
1221 codon) and *kai2b-3* (LORE1 insertion) mutants by semi-quantitative RT-PCR using primer  
1222 pairs located 5' and 3' of the mutations, as well as flanking (ML) the mutations. Transcript  
1223 accumulation of the housekeeping gene *Ubiquitin* is also shown.

1224

1225 **S9 Fig. Characterisation of the *kai2a-1* allele.**

1226 (A) Schematic representation of mis-splicing caused by the LORE1 insertion in the *kai2a-1*  
1227 mutant. (B) cDNA alignment showing the absence of nucleotides 369 to 383 in the *kai2a-1*  
1228 transcript, causing a deletion of amino acids 124 to 128 (orange). (C) Protein model of  
1229 *LjKAI2a* based on the *AtKAI2-KAR<sub>1</sub>* complex 4JYM [5] showing *KAR<sub>1</sub>* in green, residues of  
1230 the catalytic triad in red and the amino acids missing in a hypothetical *LjKAI2a-1* protein in  
1231 orange. (D) Hypocotyl elongation at 6 dpg in Arabidopsis *kai2-2* mutants transgenically  
1232 complemented with genomic and the cDNA of wild-type *LjKAI2a* and *Ljkai2a-1* driven by the  
1233 *AtKAI2* promoter (n = 75-106). Plants were grown in 8h light / 16h dark cycles. Letters  
1234 indicate different statistical groups (ANOVA, post-hoc Tukey test).

1235



1236 **S10 Fig. *Lotus japonicus* hypocotyls respond to KAR<sub>1</sub> and KAR<sub>2</sub> in a *LjKAI2a*- and**  
1237 ***LjMAX2*-dependent manner.**

1238 (A) Hypocotyls and (B) hypocotyl length of *L. japonicus* seedling at 1 wpg after treatment with  
1239 solvent (M) or three different concentrations of KAR<sub>1</sub>, KAR<sub>2</sub> or *rac*-GR24 (GR24) (n= 95-105).  
1240 Letters indicate different statistical groups (ANOVA, post-hoc Tukey test). (C) Hypocotyl  
1241 length of the indicated genotypes at 1 wpg after treatment with solvent (Mock), 1 μM KAR<sub>1</sub>  
1242 or 1 μM KAR<sub>2</sub> (n = 73-107). (D) Hypocotyl length of wild-type and *max2-4* seedlings 1 wpg  
1243 after treatment with solvent (Mock), 1 μM KAR<sub>1</sub>, 1 μM KAR<sub>2</sub> (n = 66-96). (E) RT-qPCR-based  
1244 expression of *DLK2* in hypocotyls at 1 wpg after 2 hours treatment with solvent (Mock), 1 μM  
1245 KAR<sub>1</sub>, 1 μM KAR<sub>2</sub>, or 1 μM *rac*-GR24 (GR24) (n = 3). Expression values were normalized to  
1246 those of the housekeeping gene *Ubiquitin*. (A-E) Seedlings were grown in 8h light / 16h dark  
1247 cycles. (C-E) Asterisks indicate significant differences of the compounds versus mock  
1248 treatment (ANOVA, post-hoc Dunnett test, N.S.>0.05, \*≤0.05, \*\*≤0.01, \*\*\*≤0.001).

1249

1250 **S11 Fig. Small overlap between transcriptional responses of *Lotus japonicus* roots to**  
1251 **KAR<sub>1</sub> and *rac*-GR24.**

1252 Number of differentially expressed genes (DEGs, adjusted p-value < 0.01) as assessed by  
1253 microarray analysis. Left panel: DEGs responding to 1 μM KAR<sub>1</sub> after 1h, 2h and 6h  
1254 incubation. Middle panel: DE genes responding to 1 μM *rac*-GR24 1h, 2, 6h incubation. Right  
1255 panel: comparison of DE genes responding to 2 h treatment with KAR<sub>1</sub> and *rac*-GR24.

1256

1257 **S12 Fig. KAR perception mutants are less responsive to KAR<sub>1</sub> treatment.**

1258 (A-C) Post-embryonic-root (PER) density of *L. japonicus* plants, 2 wpg after treatment with  
1259 solvent (Mock) or 1  $\mu$ M KAR<sub>1</sub>, of wild-type, (A) *kai2a-1*, *kai2b-1* and *kai2a-1 kai2b-1* (n= 32-  
1260 50); (B) *max2-4* (n= 34-43); (c) *kai2a-1*, *kai2b-3* and *kai2a-1 kai2b-1* (n= 37-72). (A-C)  
1261 Asterisks indicate significant differences versus mock treatment (Welch t.test, \* $\leq$ 0.05,  
1262 \*\* $\leq$ 0.01, \*\*\* $\leq$ 0.001).

1263

1264 **S13 Fig. KAR<sub>1</sub> response in roots requires *LjKAI2a* or *LjKAI2b* and *LjMAX2*.**

1265 Primary-root length (PRL) and post-embryonic-root (PER) number of *L. japonicus* plants, 2  
1266 wpg after treatment with solvent (Mock) or 3  $\mu$ M KAR<sub>1</sub> (n=34-72) displayed in Fig 9A.  
1267 Asterisks indicate significant differences versus mock treatment (Welch t.test, \* $\leq$ 0.05,  
1268 \*\* $\leq$ 0.01, \*\*\* $\leq$ 0.001).

1269

1270

1271

1272

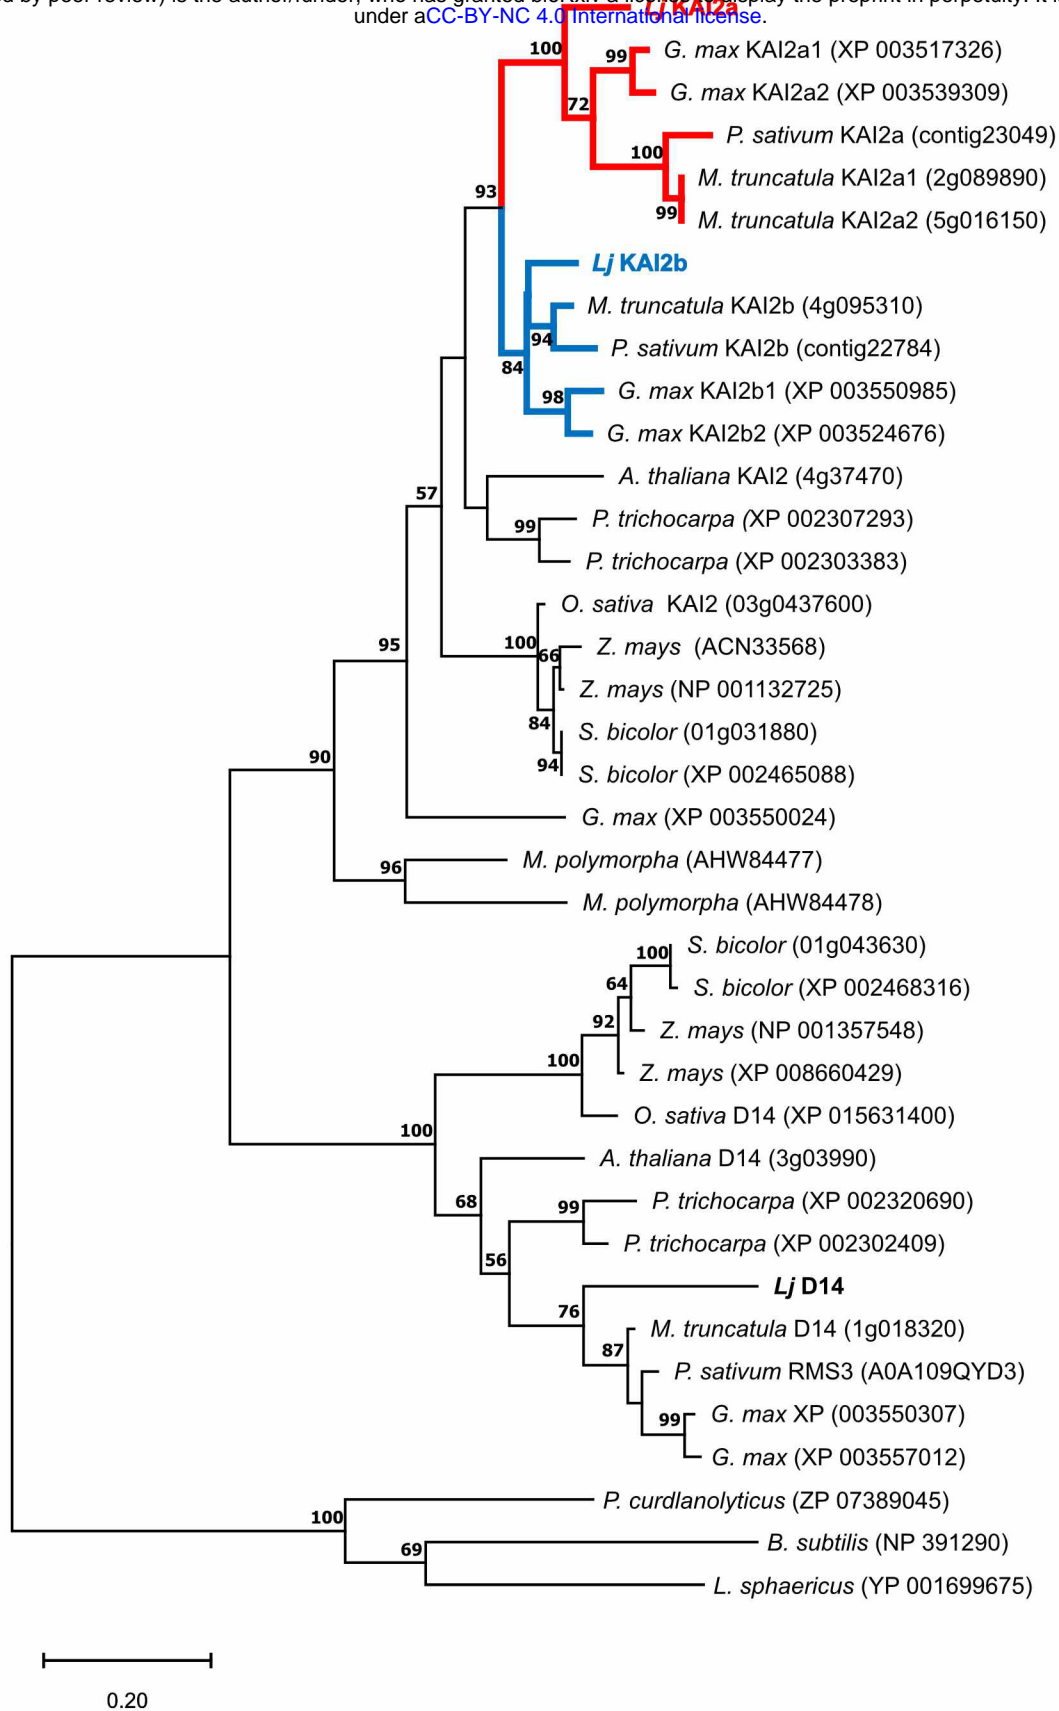

**Figure 1. The KAI2 gene underwent duplication prior to diversification of the legumes.**

Phylogenetic tree of KAI2 and D14 rooted with bacterial RbsQ from indicated species (*Lotus japonicus*; *Glycine max*; *Pisum sativum*; *Medicago truncatula*; *Arabidopsis thaliana*; *Populus trichocarpa*; *Oryza sativa*; *Zea mays*; *Sorghum bicolor*; *Marchantia polymorpha*). MEGAX was used to align the protein sequences with MUSCLE and generate a tree inferred by Maximum Likelihood method [72]. The tree with the highest log likelihood (-7359.19) is shown. The percentage of trees in which the associated taxa clustered together is shown next to the branches. Values below 50 were ignored. KAI2 duplication in the legumes is highlighted by red and blue branches.

**A**

bioRxiv preprint doi: <https://doi.org/10.1101/754937>; this version posted September 2, 2020. The copyright holder for this preprint (which was not certified by peer review) is the author/funder, who has granted bioRxiv a license to display the preprint in perpetuity. It is made available under aCC-BY-NC 4.0 International license.

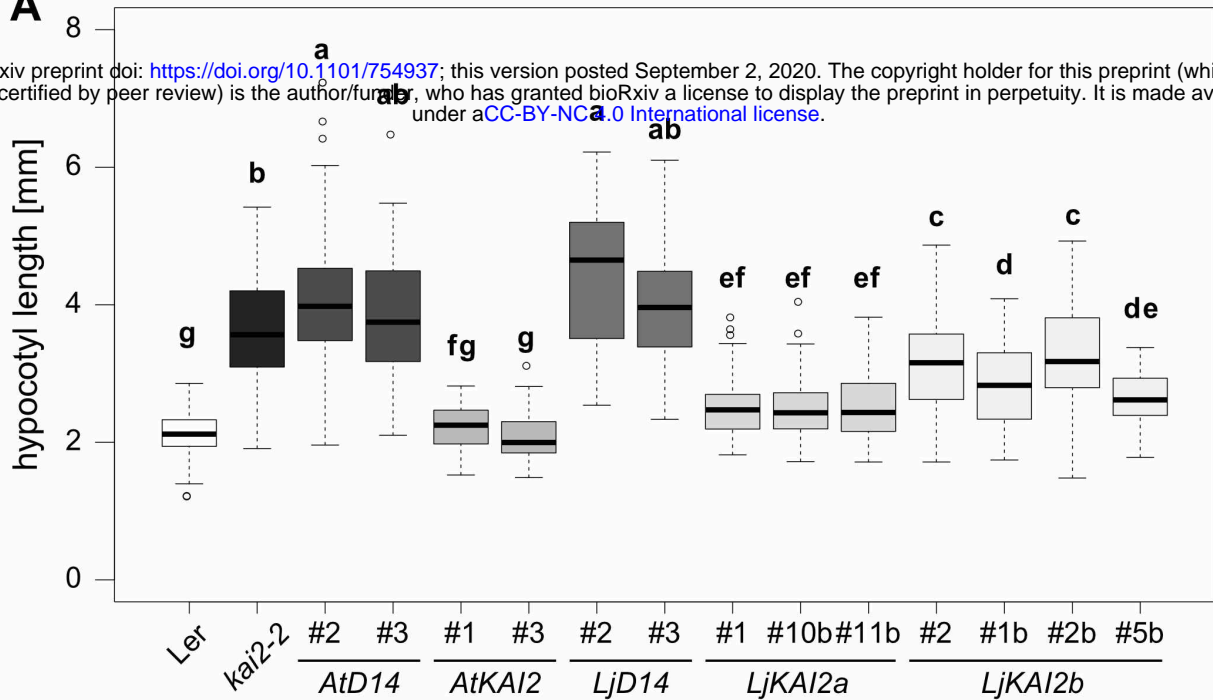**B**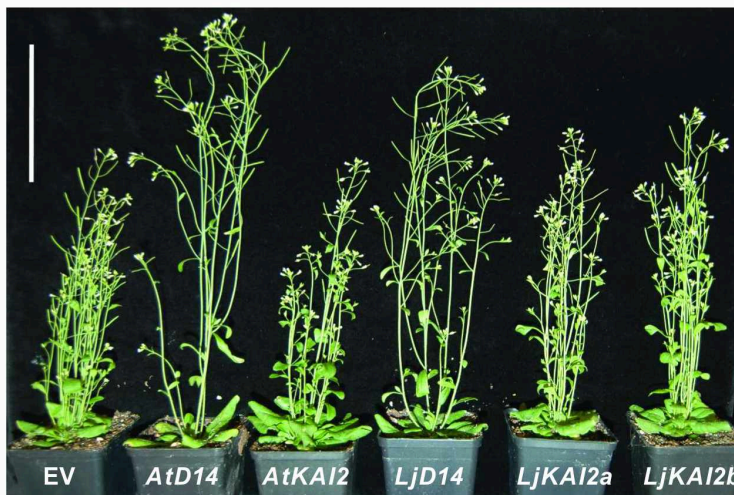**C**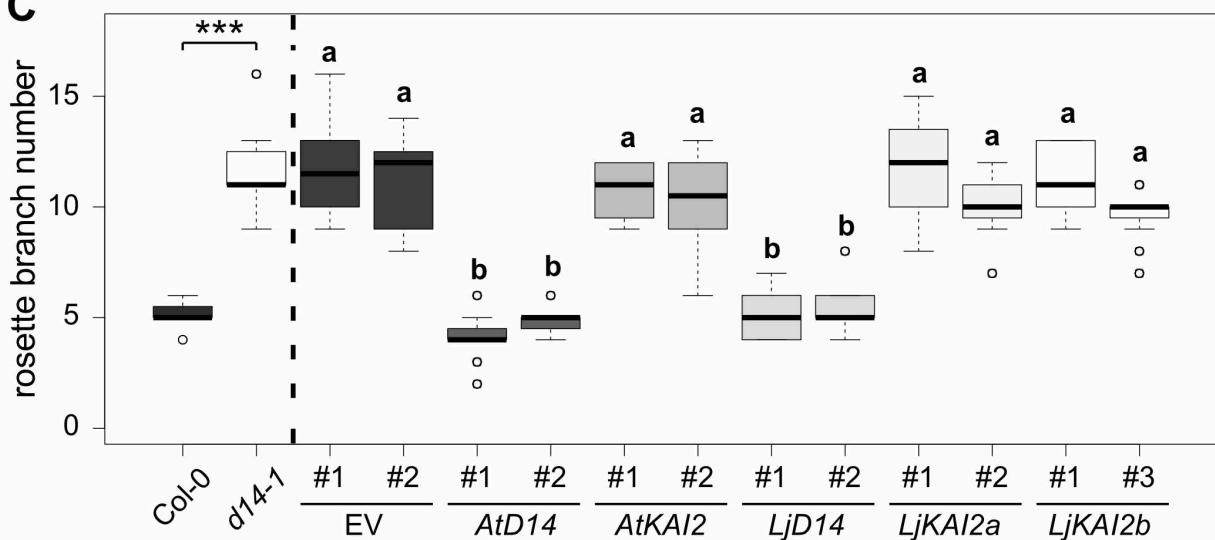

**Figure 2. *Lotus japonicus* D14, KAI2a and KAI2b can replace D14 and KAI2 in Arabidopsis, respectively.**

(A) Hypocotyl length of *A. thaliana* wild-type (Ler), *kai2-2* and *kai2-2* lines complemented by *AtD14*, *AtKAI2*, *LjD14*, *LjKAI2a* and *LjKAI2b*, driven by the *AtKAI2* promoter at 6 days post germination (dpg). Seedlings were grown in 8h light / 16h dark periods (n=37-122). (B) Shoots of *A. thaliana* *d14-1*, with an empty vector (EV) or complemented with *AtD14*, *AtKAI2*, *LjD14*, *LjKAI2a* and *LjKAI2b*, driven by the *AtD14* promoter at 26 dpg. Scale bar = 10 cm. (C) Rosette branch number at 26 dpg of *A. thaliana* wild-type (Col-0), *d14-1* and *d14-1* lines carrying an empty vector (EV) or plasmids containing *AtD14*, *AtKAI2*, *LjD14*, *LjKAI2a* and *LjKAI2b*, driven by the *AtD14* promoter (n=24). Letters indicate different statistical groups (ANOVA, post-hoc Tukey test).

bioRxiv preprint doi: <https://doi.org/10.1101/754937>; this version posted September 2, 2020. The copyright holder for this preprint (which was not certified by peer review) is the author/funder, who has granted bioRxiv a license to display the preprint in perpetuity. It is made available under aCC-BY-NC 4.0 International license.

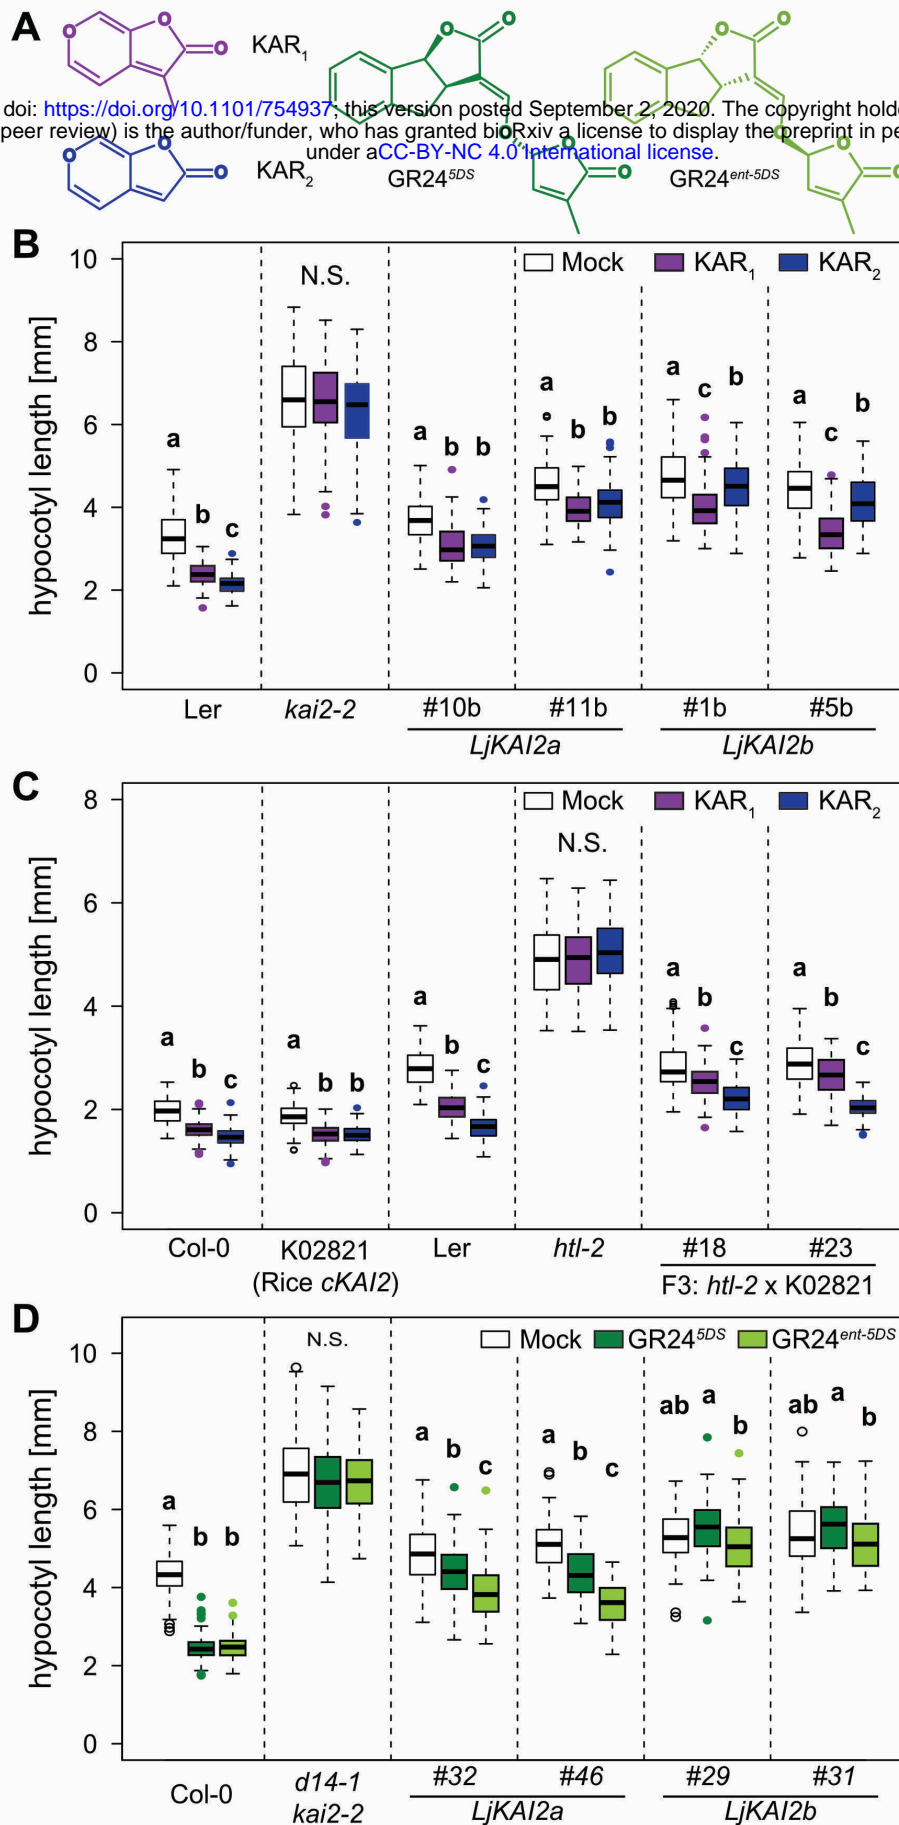

**Figure 3. *Lotus japonicus* KAI2a, KAI2b and rice D14L confer divergent hypocotyl growth responses to KAR<sub>1</sub> and KAR<sub>2</sub> in *Arabidopsis*.**

(A) Structures of KAR<sub>1</sub>, KAR<sub>2</sub>, GR24<sup>5DS</sup> and GR24<sup>ent-5DS</sup>. (B-C) Hypocotyl length of *A. thaliana kai2* mutants complemented with *KAI2* from *A. thaliana*, *L. japonicus* and rice, after treatment with solvent (Mock), 1  $\mu$ M KAR<sub>1</sub> or KAR<sub>2</sub> at 6 dpg. (B) Ler wild-type, *kai2-2* and *kai2-2* lines complemented with *AtKAI2*, *LjKAI2a* and *LjKAI2b*, driven by the *AtKAI2* promoter (n= 33-128). (C) Ler and Col-0 wild-type, *htl-2* (Ler), K02821-line transgenic for *p35S:OsD14L* (Col-0), and two homozygous F<sub>3</sub> lines from the *htl-2* x K02821 cross [16] (n= 80-138). (D) Hypocotyl length of *A. thaliana* Col-0 wild-type, *d14-1 kai2-2* double mutants, and *d14-1 kai2-2* lines complemented with *LjKAI2a* and *LjKAI2b*, driven by the *AtKAI2* promoter after treatment with solvent (Mock), 1  $\mu$ M GR24<sup>5DS</sup> or GR24<sup>ent-5DS</sup> (n= 59-134). (B-D) Seedlings were grown in 8h light / 16h dark periods. Letters indicate different statistical groups (ANOVA, post-hoc Tukey test).

**A****LjKAI2a****LjKAI2b**

bioRxiv preprint doi: <https://doi.org/10.1101/754937>; this version posted September 2, 2020. The copyright holder for this preprint (which was not certified by peer review) is the author/funder, who has granted bioRxiv a license to display the preprint in perpetuity. It is made available under aCC-BY-NC 4.0 International license.

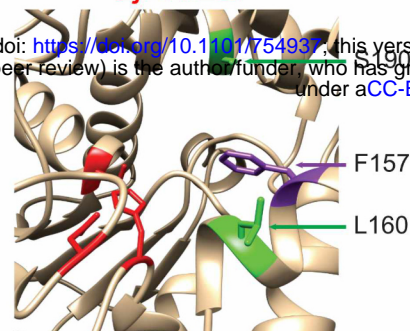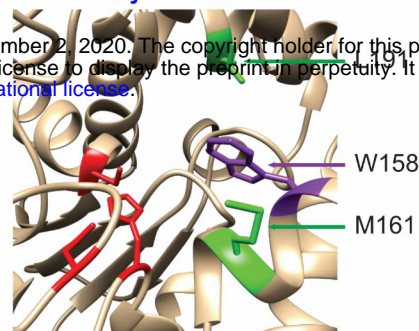**B**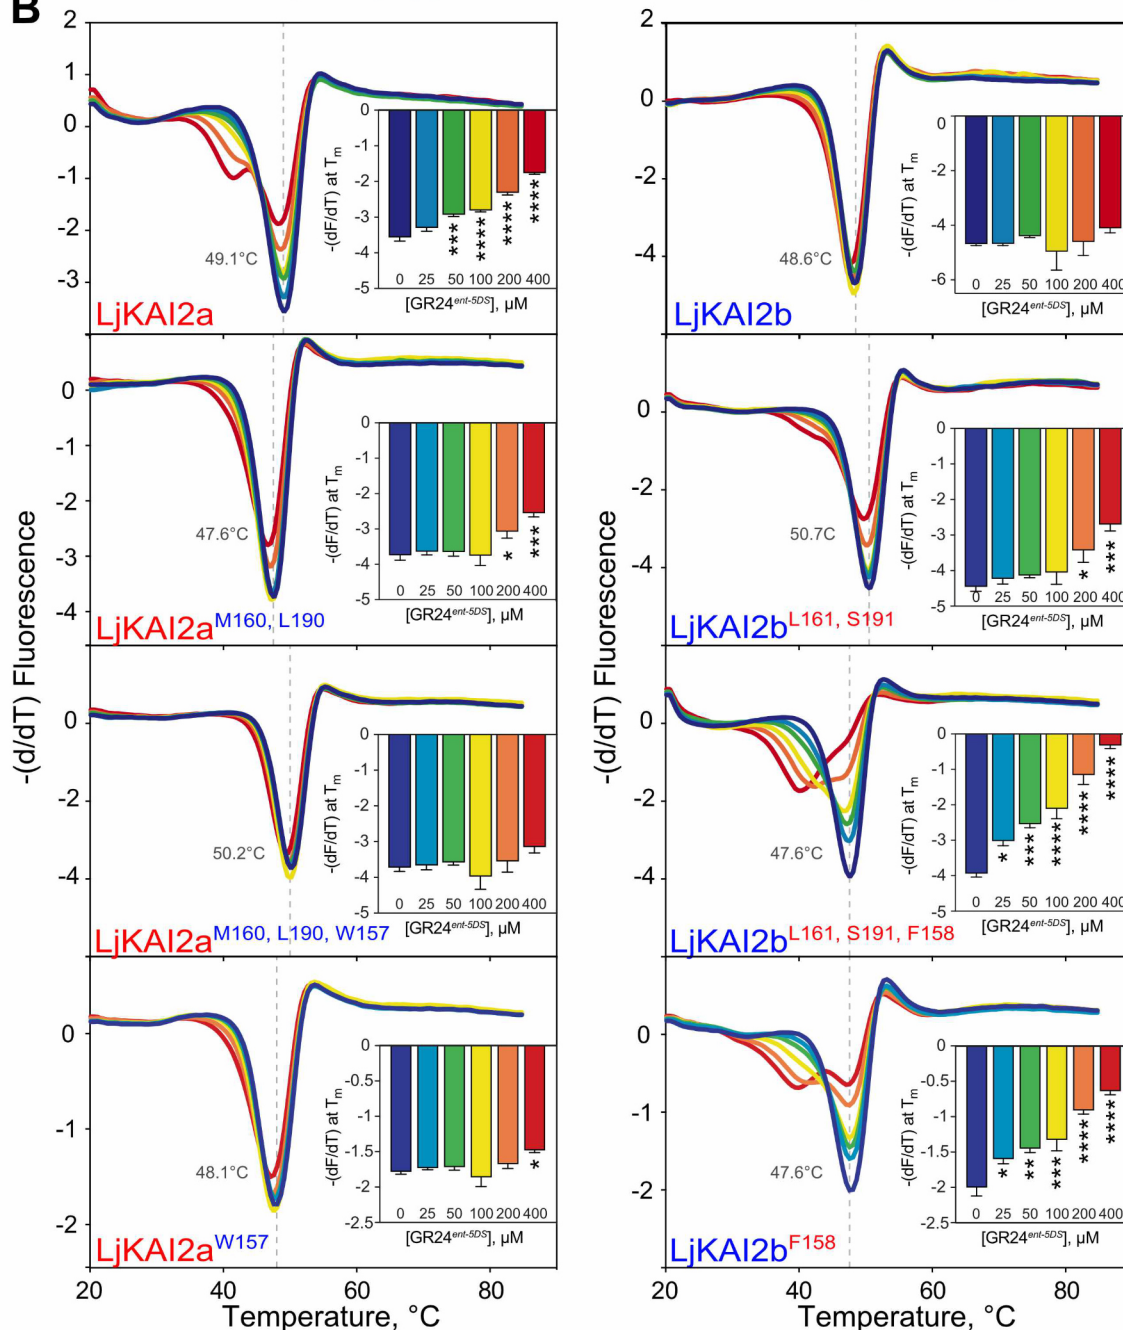

**Figure 4. Binding of GR24<sup>ent-5DS</sup> to LjKAI2a is determined by three amino acids.**

(A) The ligand-binding cavity regions of LjKAI2a and LjKAI2b proteins after structural homology modelling on the KAI2 crystal structure of *A. thaliana* [5]. Conserved residues in the cavity that differ between the KAI2a and KAI2b clades, and that are also different between LjKAI2b and AtKAI2, are shown in green. The phenylalanine residue in LjKAI2a, which is changed to tryptophan in LjKAI2b, is shown in violet. The catalytic triad is coloured in red. (B) DSF curves of purified SUMO fusion proteins of wild-type LjKAI2a and LjKAI2b, and versions with swapped amino acids LjKAI2a<sup>M160, L190</sup>, LjKAI2b<sup>L161, S191</sup>, LjKAI2a<sup>W157, M160, L190</sup>, LjKAI2b<sup>F158, L161, S191</sup>, LjKAI2a<sup>W157</sup>, LjKAI2b<sup>F158</sup> at the indicated concentrations of GR24<sup>ent-5DS</sup>. The first derivative of the change of fluorescence was plotted against the temperature. Each curve is the arithmetic mean of three sets of reactions, each comprising four technical replicates. Peaks indicate the protein melting temperature. The shift of the peak in LjKAI2a indicates ligand-induced thermal destabilisation consistent with a protein-ligand interaction. Insets plot the minimum value of  $(-dF/dT)$  at the melting point of the protein as determined in the absence of ligand (means  $\pm$  SE,  $n = 3$ ). Asterisks indicate significant differences to the solvent control (ANOVA, post-hoc Dunnett test, N.S. $>0.05$ , \* $\leq 0.05$ , \*\* $\leq 0.01$ , \*\*\* $\leq 0.001$ , \*\*\*\* $\leq 0.0001$ ).

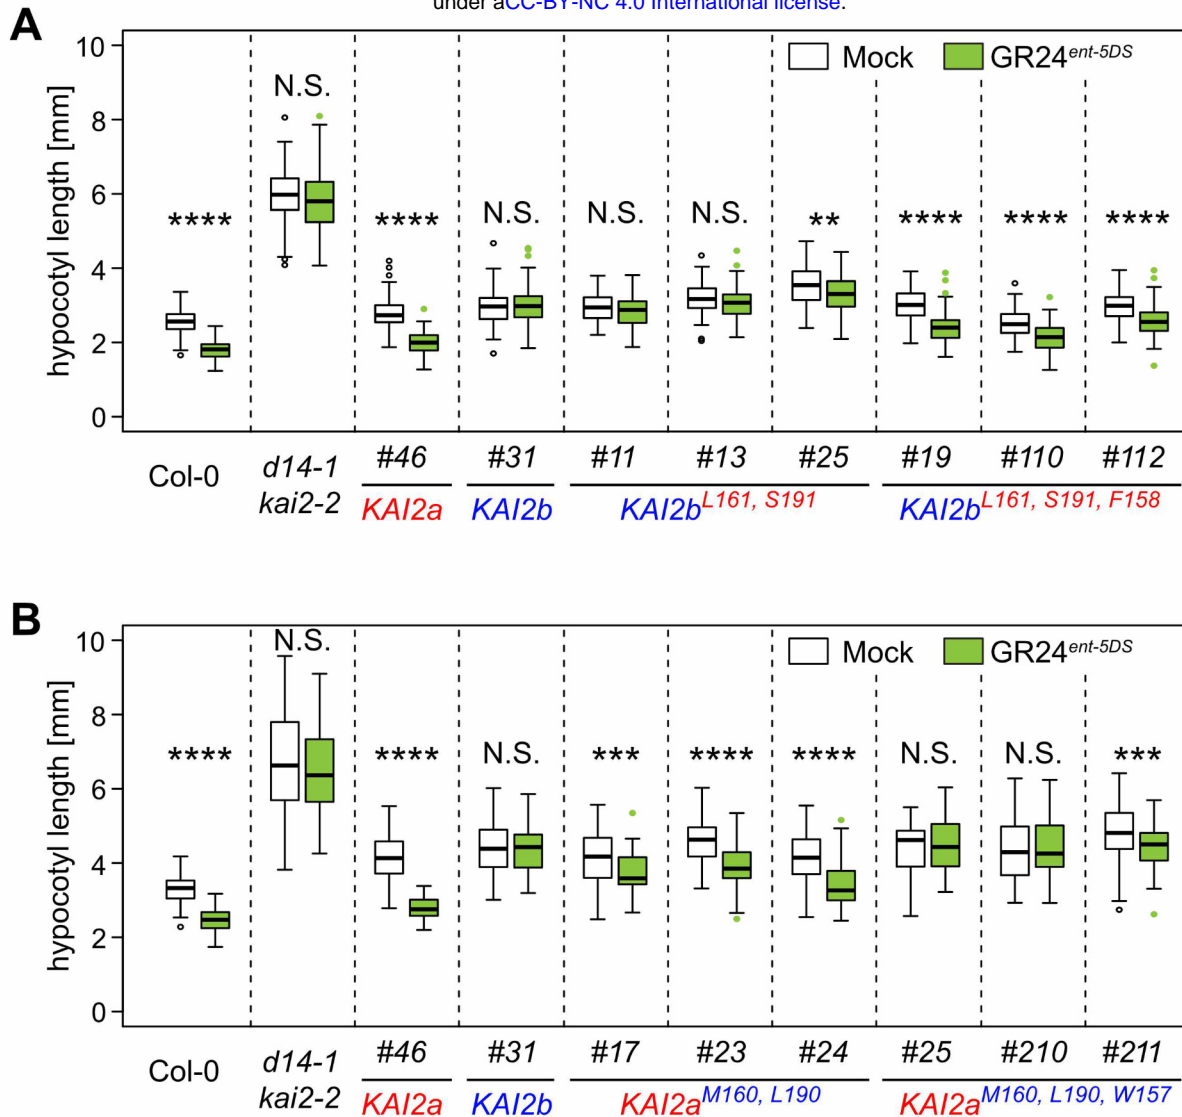

**Figure 5. Amino acid swaps reverse sensitivity of *LjKAI2a* and *LjKAI2b* to GR24<sup>ent-5DS</sup> in Arabidopsis hypocotyls.**

Hypocotyl length of *A. thaliana* Col-0 wild-type, *d14-1 kai2-2* double mutants, and *d14-1 kai2-2* lines complemented with *LjKAI2a* and *LjKAI2b* variants driven by the *AtKAI2* promoter and after treatment with solvent (Mock), 1  $\mu$ M GR24<sup>5DS</sup> or GR24<sup>ent-5DS</sup>. (A) *LjKAI2a<sup>M160, L190</sup>* and *LjKAI2a<sup>M160, L190, W157</sup>* (n = 46-84). (B) *LjKAI2b<sup>L161, S191</sup>* and *LjKAI2b<sup>L161, S191, F158</sup>* (n = 49-102). (A-B) Seedlings were grown in 8h light / 16h dark periods Asterisks indicate significant differences versus mock treatment (Welch t.test, \* $\leq$ 0.05, \*\* $\leq$ 0.01, \*\*\* $\leq$ 0.001, \*\*\*\* $\leq$ 0.0001).

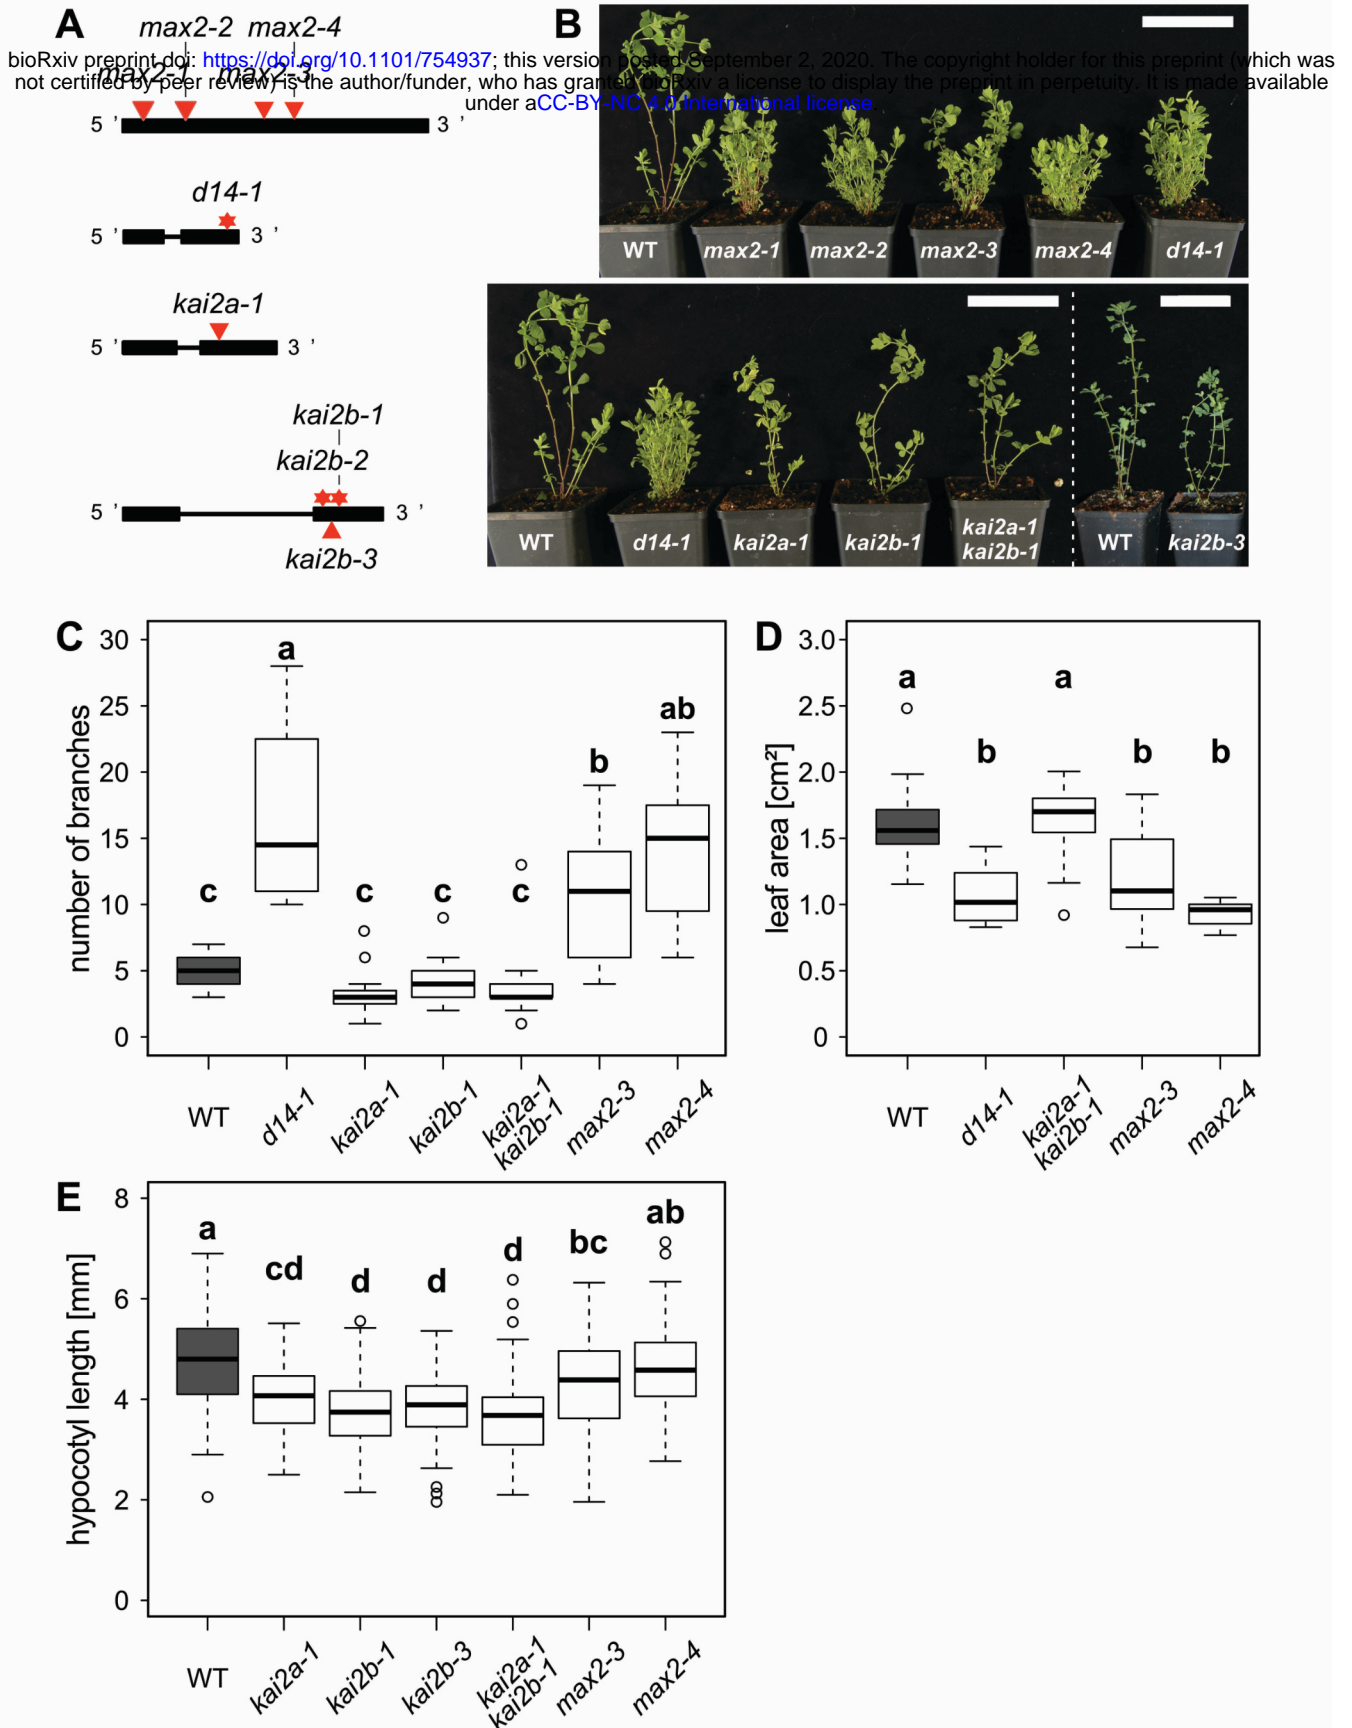

**Figure 6. Role of *D14*, *KAI2a*, *KAI2b* and *MAX2* in shoot and hypocotyl development of *Lotus japonicus*.**

(A) Schematic representation of the *L. japonicus* *D14*, *KAI2a*, *KAI2b* and *MAX2* genes. Black boxes and lines show exons and introns, respectively. *LORE1* insertions are indicated by red triangles and EMS mutations by red stars. (B) Shoot phenotype of *L. japonicus* wild-type and karrikin and strigolactone perception mutants at 8 weeks post germination (wpg). Scale bars: 7 cm. (C) Number of branches and of *L. japonicus* wild-type, karrikin and strigolactone perception mutants at 7 wpg (n = 12-21). (D) Leaf size of the indicated genotypes at 9 wpg (n = 12-15 plants with an average of 3 leaves). (E) Hypocotyl length of the indicated genotypes of *L. japonicus* under short day conditions (8h light/ 16h dark) at 1 wpg (n = 79-97). (C-E) Letters indicate different statistical groups (ANOVA, post-hoc Tukey test).



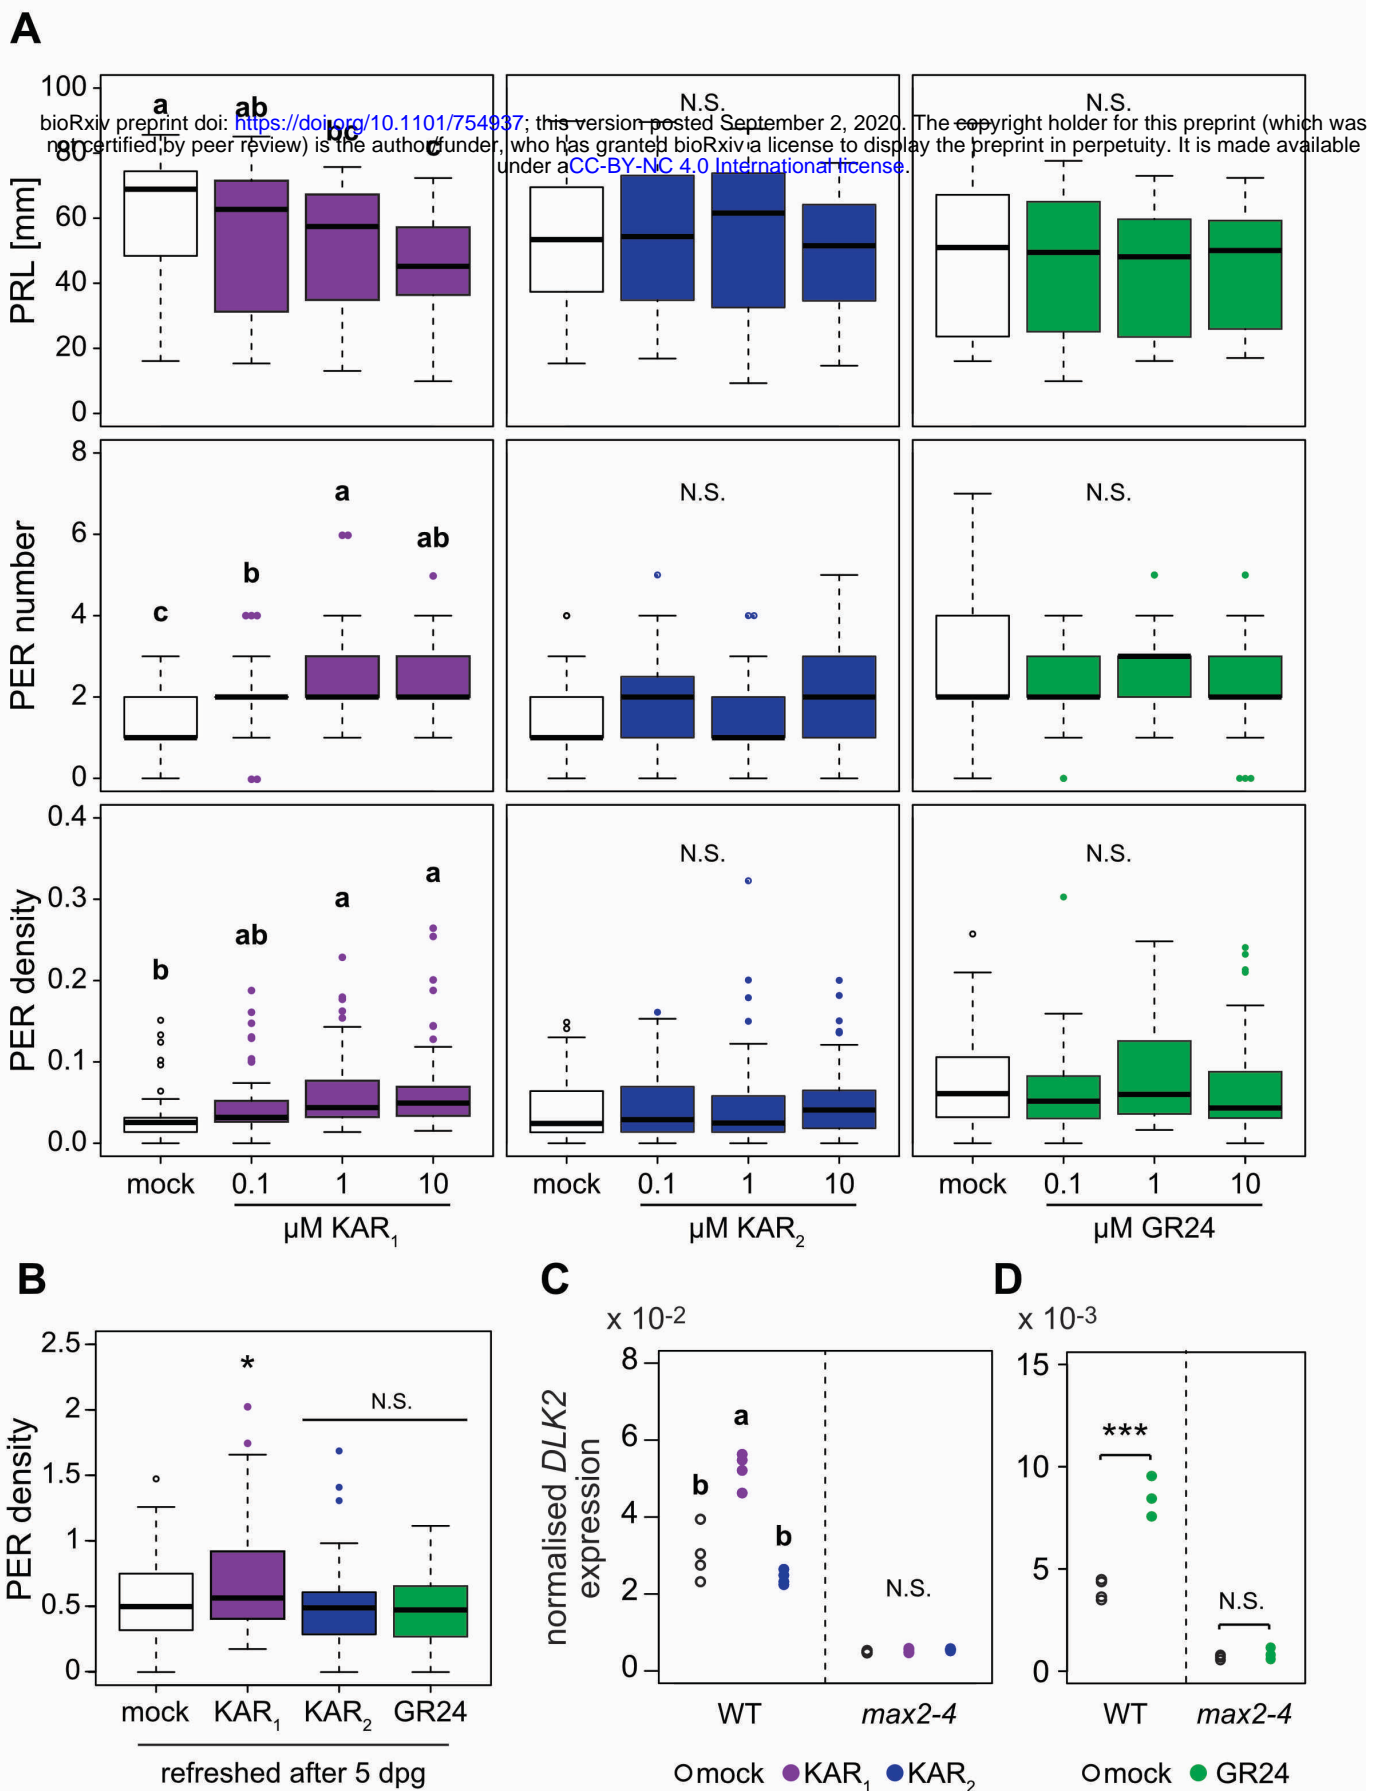

**Figure 7. *Lotus japonicus* root system architecture is affected specifically by treatment with KAR<sub>1</sub> but not KAR<sub>2</sub>.** (A) Primary root length (PRL), post-embryonic root (PER) number and PER density of wild-type plants 2 wpg after treatment with solvent (M) or three different concentrations of KAR<sub>1</sub>, KAR<sub>2</sub> or *rac*-GR24 (GR24) (n = 32-57). (B) PER density of wild-type plants at 2 wpg and treated with solvent (Mock) 1 μM KAR<sub>1</sub>, 1 μM KAR<sub>2</sub>, or 1 μM *rac*-GR24 (n = 43-51). Plants were transferred onto fresh hormone-containing medium after 5 days. (C-D) qRT-PCR-based expression of *DLK2* normalized to *Ubiquitin* expression in roots at 2 wpg after 2 hours treatment with solvent (Mock), (C) 1 μM KAR<sub>1</sub> and 1 μM KAR<sub>2</sub>, (D) 1 μM *rac*-GR24 (n = 4). (A and C) Letters indicate different statistical groups (ANOVA, post-hoc Tukey test). (B) Asterisks indicate significant differences (ANOVA, Dunnett test, N.S.>0.05, \*≤0.05). (D) Asterisks indicate significant differences versus mock treatment (Welch t.test, \*≤0.05, \*\*≤0.01, \*\*\*≤0.001).

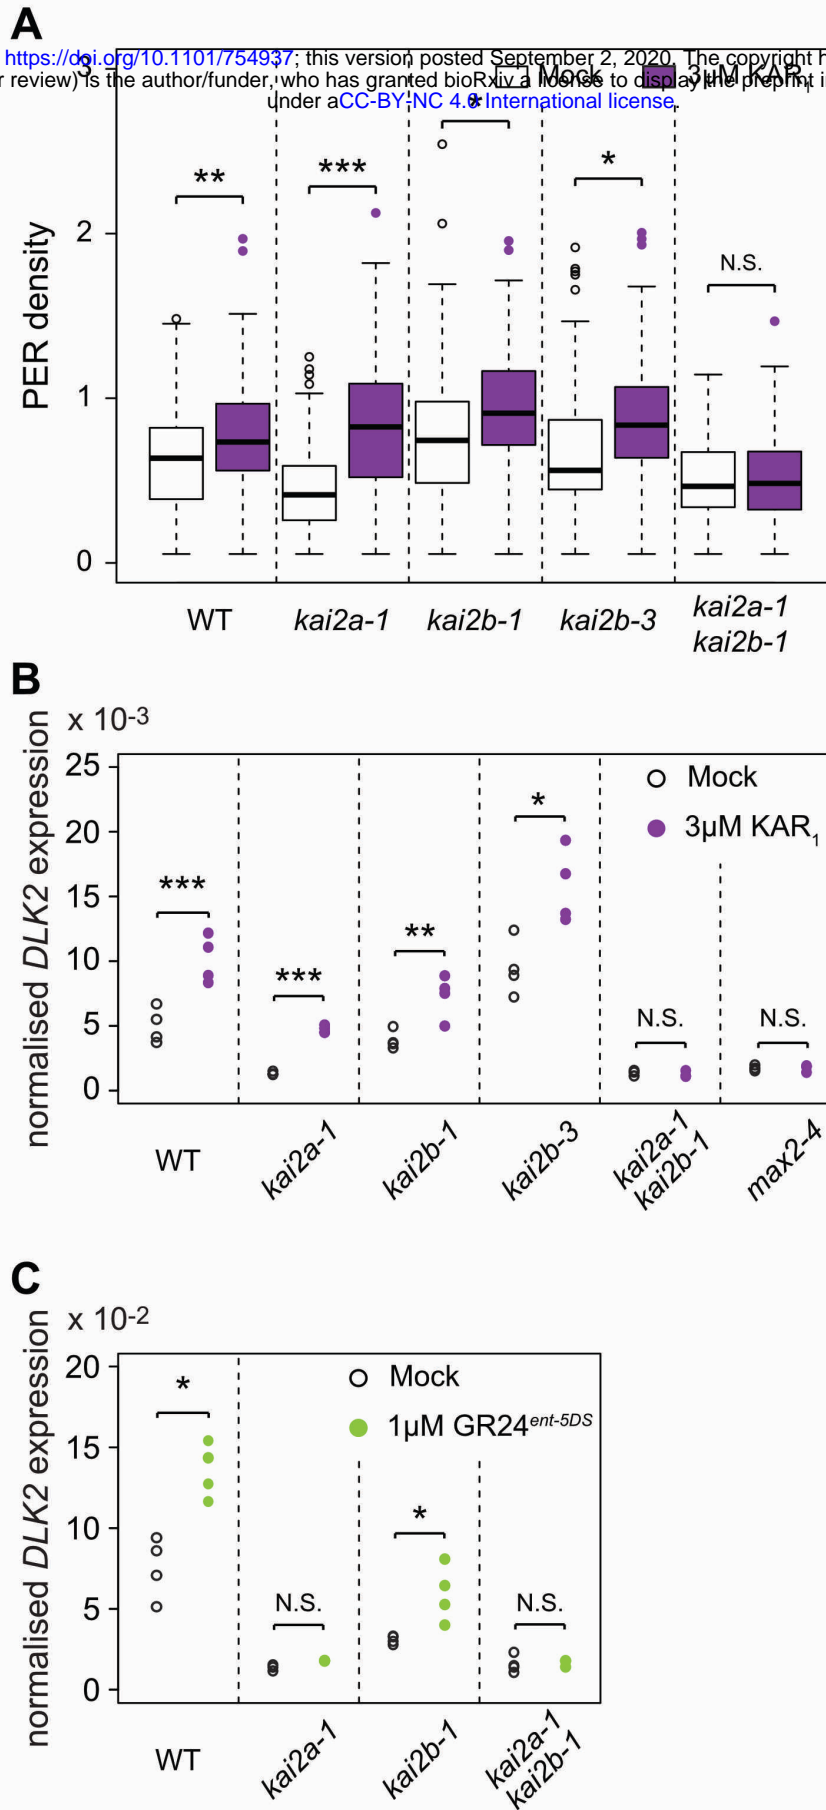

**Figure 8. *LjKAI2a* and *LjKAI2b* operate redundantly in the response of roots to KAR<sub>1</sub>**  
**(A)** Post-embryonic-root (PER) density of *L. japonicus* plants, 2 wpg after treatment with solvent (M) or 3 µM KAR<sub>1</sub> (n=34-72). **(B-C)** qRT-PCR-based expression of *DLK2* in roots of *L. japonicus* plants at 2 wpg after 2 hours treatment with solvent (Mock) or **(B)** 3 µM KAR<sub>1</sub> or **(C)** 1 µM GR24<sup>ent-5DS</sup>. Expression values were normalized to those of the housekeeping gene *Ubiquitin* (n= 3-4). **(A-C)** Asterisks indicate significant differences versus mock treatment (Welch t.test, \*≤0.05, \*\*≤0.01, \*\*\*≤0.001).

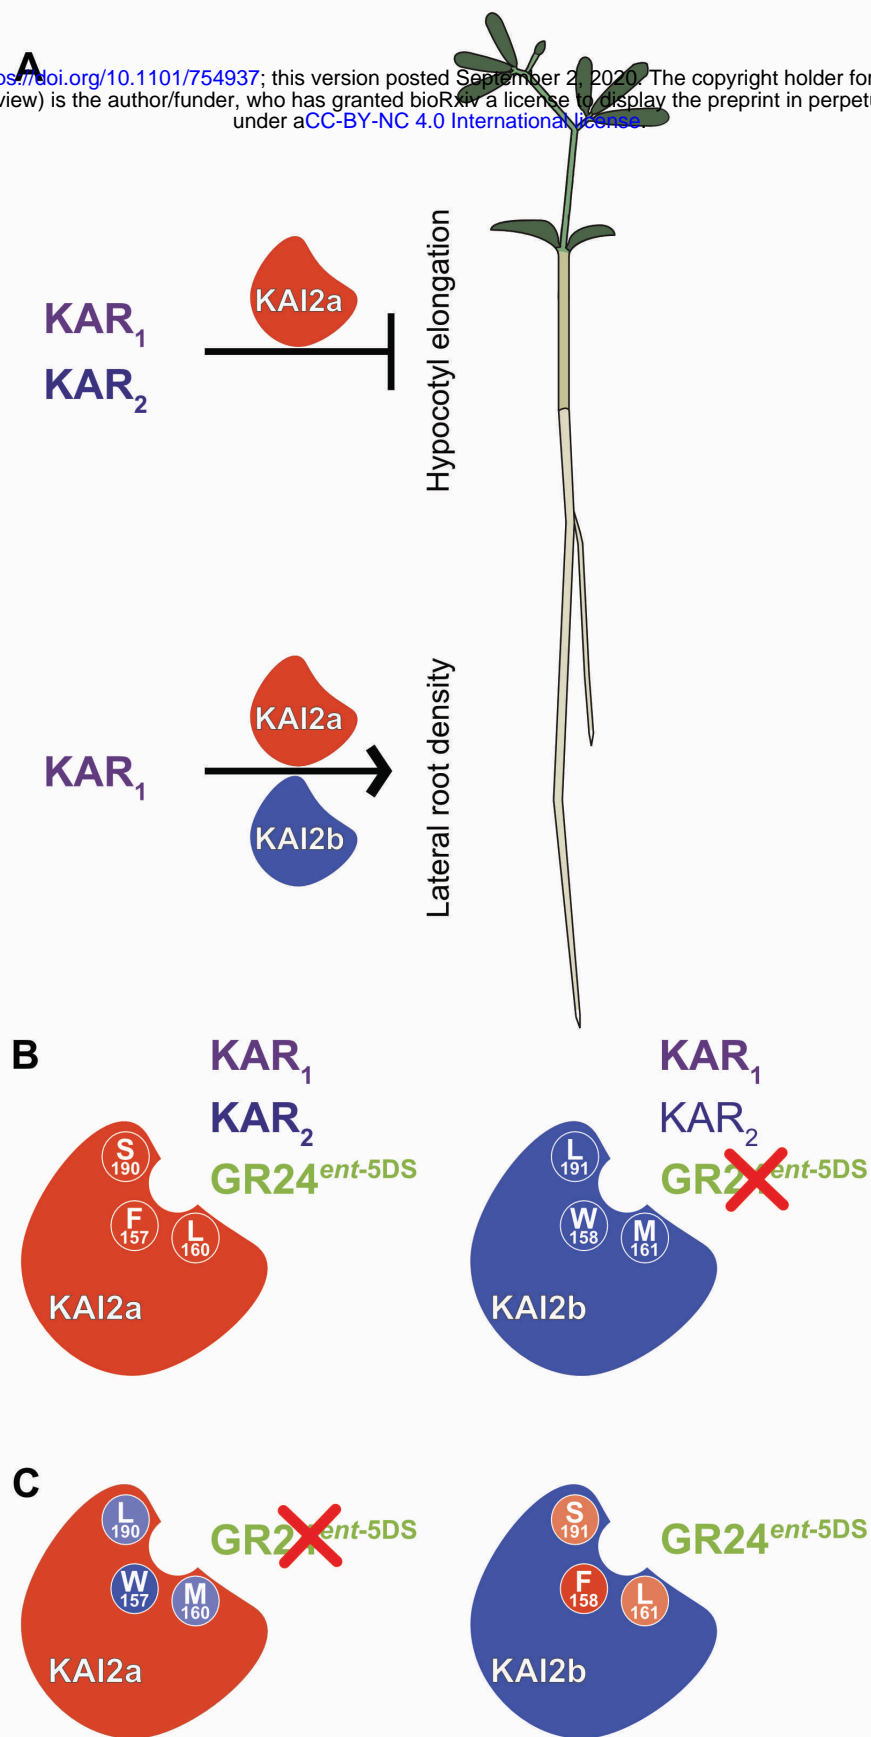

**Figure 9. *L. japonicus* KAI2a and KAI2b display organ-specific redundancy and differ in their ligand-binding specificity.** (A) *LjKAI2a* is required to mediate inhibition of hypocotyl growth in response to  $KAR_1$  and  $KAR_2$ . In roots *LjKAI2a* and *LjKAI2b* redundantly promote lateral root density, but only in response to  $KAR_1$  treatment. (B) Upper panel: In the *Arabidopsis kai2-2* background *LjKAI2a* mediates hypocotyl growth inhibition in response to  $KAR_1$ ,  $KAR_2$  and  $GR24^{ent-5DS}$ . In the same background, *LjKAI2b* mediates a stronger response to  $KAR_1$  than to  $KAR_2$  and no response to  $GR24^{ent-5DS}$  (indicated by a red cross). Three divergent amino acids at the binding pocket are indicated in white. Lower panel: Swapping the three divergent amino acids in the binding pocket reconstitutes  $GR24^{ent-5DS}$  activity through *LjKAI2b* and abolishes  $GR24^{ent-5DS}$  activity through *LjKAI2a*. Among the three amino acids F157/W158 are decisive for  $GR24^{ent-5DS}$  binding (strong colors), while L160/M161 and S190/L191 play a weaker role (pale colors). Amino acids from *LjKAI2a* have a red/pale red and amino acids from *LjKAI2b* a violet/pale background.
